# Supplementary material for: Translesion synthesis by AMV, HIV, and MMLVreverse transcriptases using RNA templates containing inosine, guanosine, and their 8-oxo-7,8-dihydropurine derivatives
Source: PubMed Central journal article supplement (PMC7455023; doi:10.1371/journal.pone.0235102), 2020-08-28

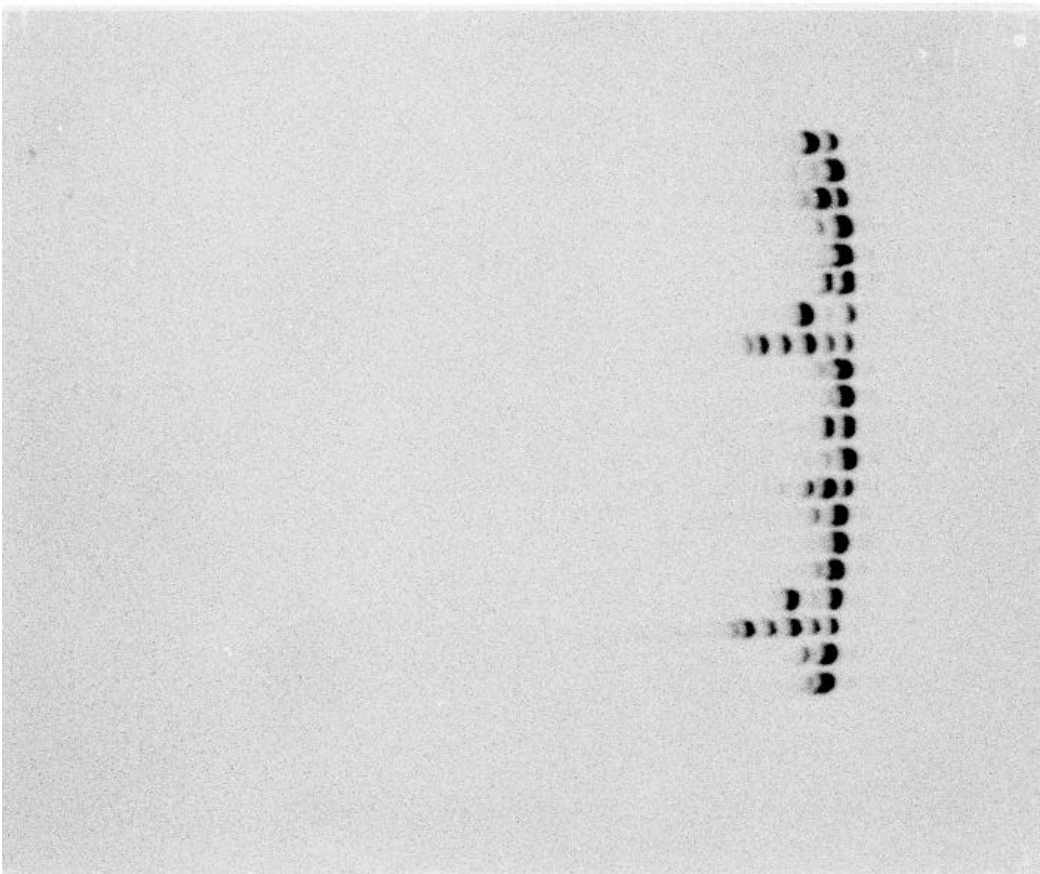

Figure 2B

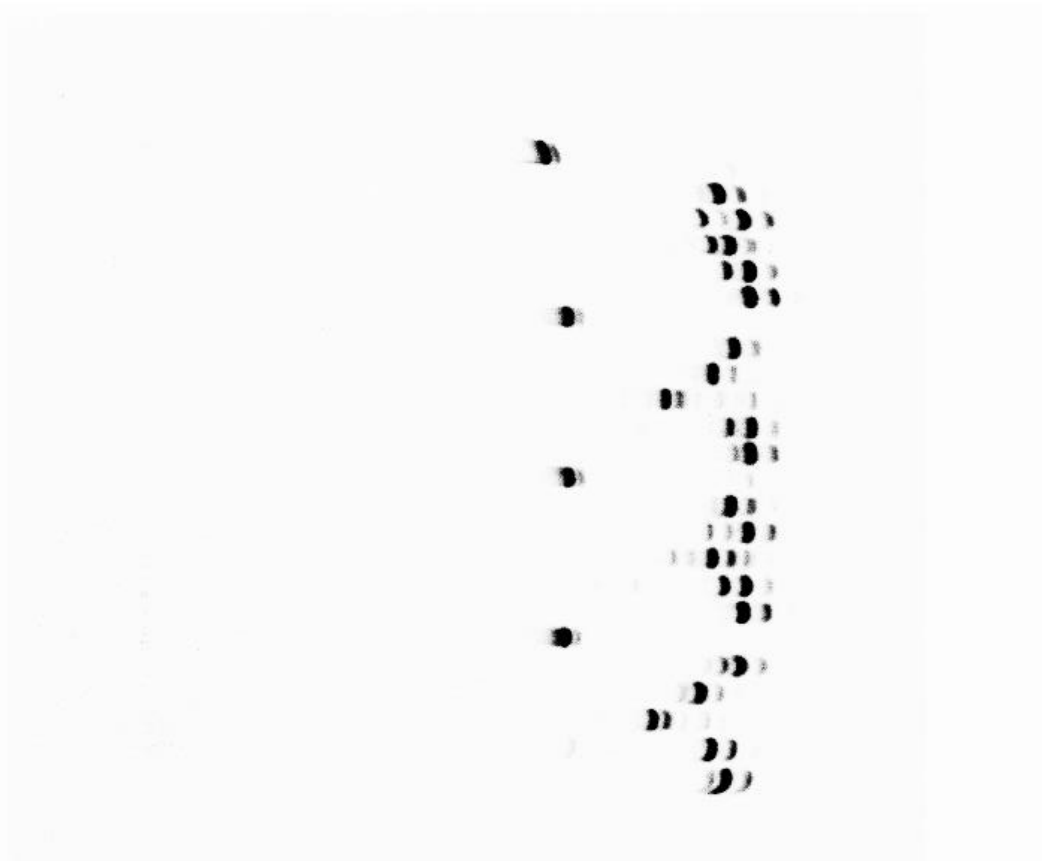

Figure 2D

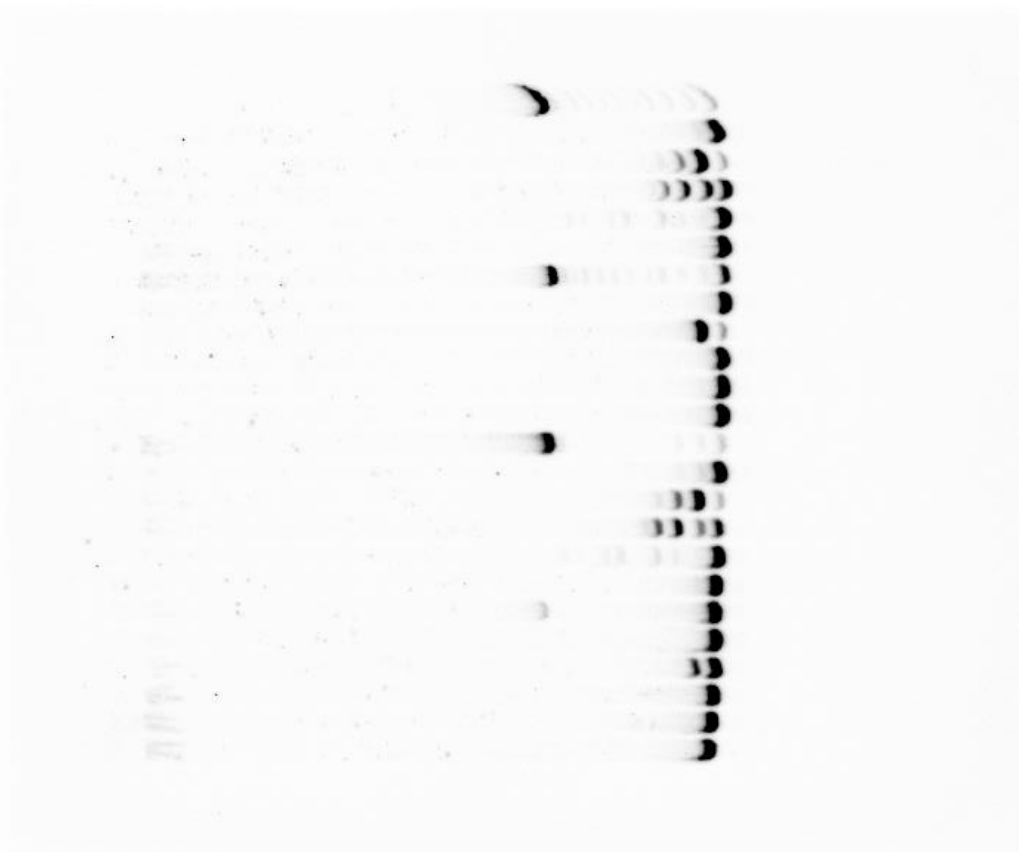

Figure 3B

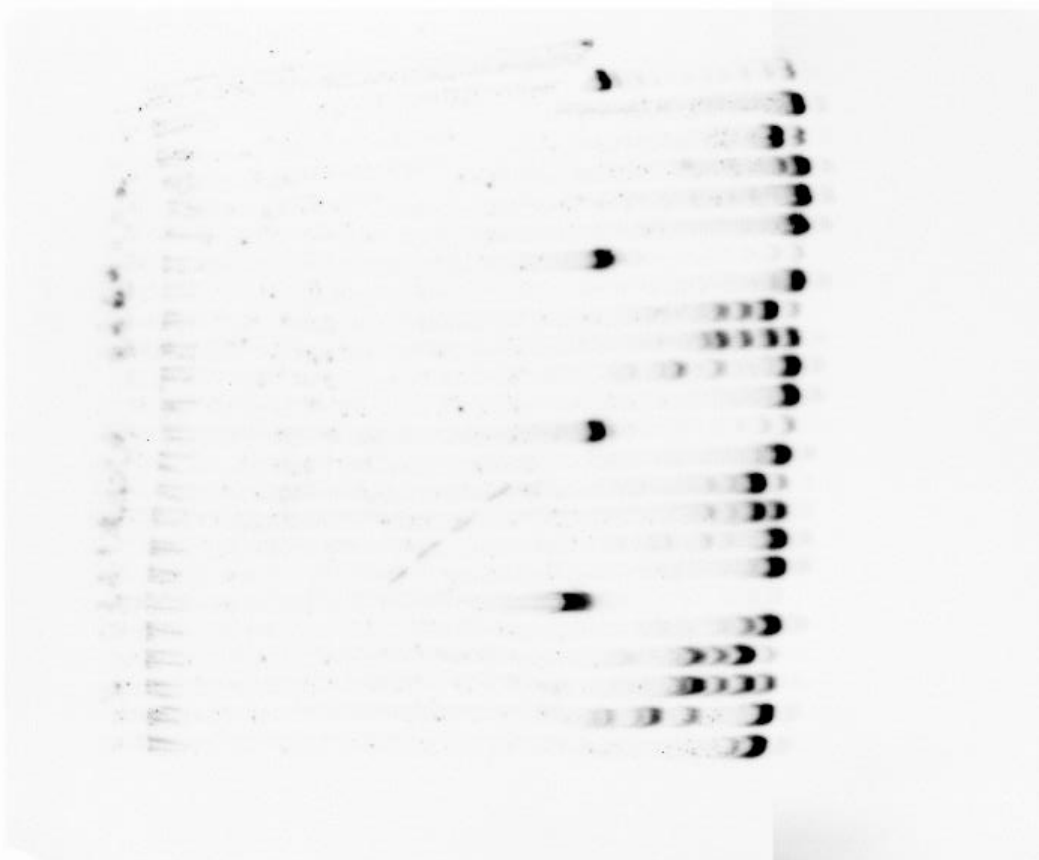

Figure 3C

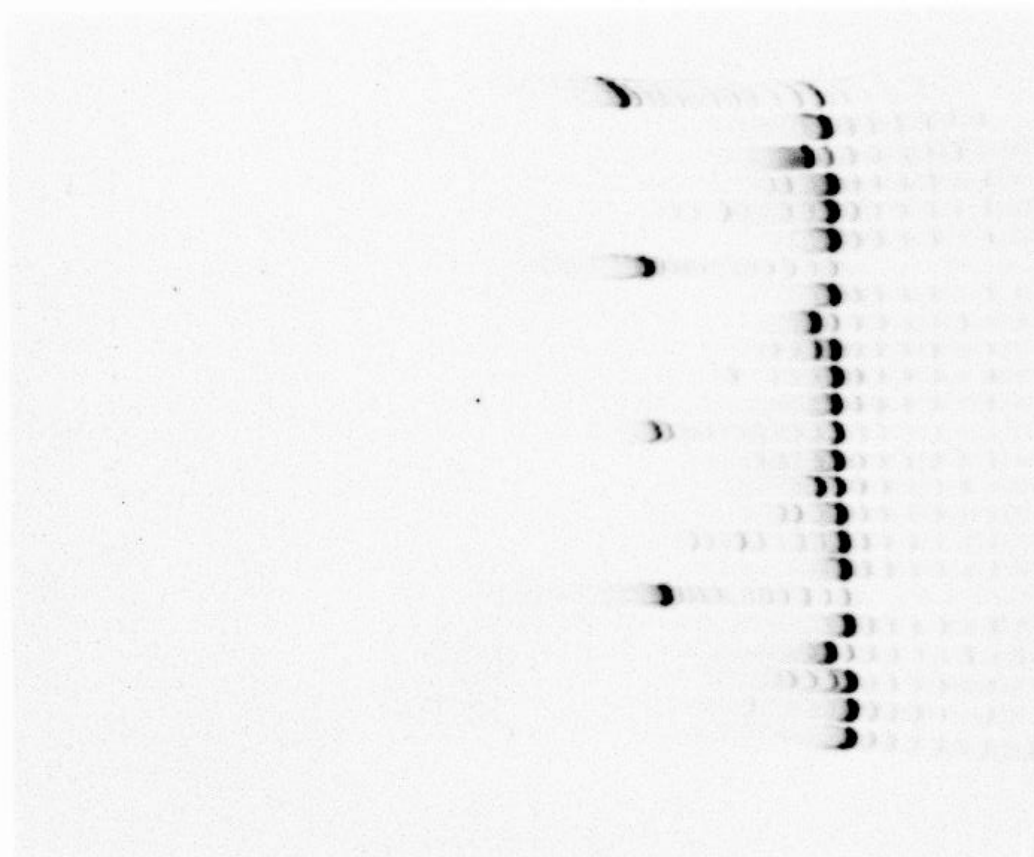

Figure 3D

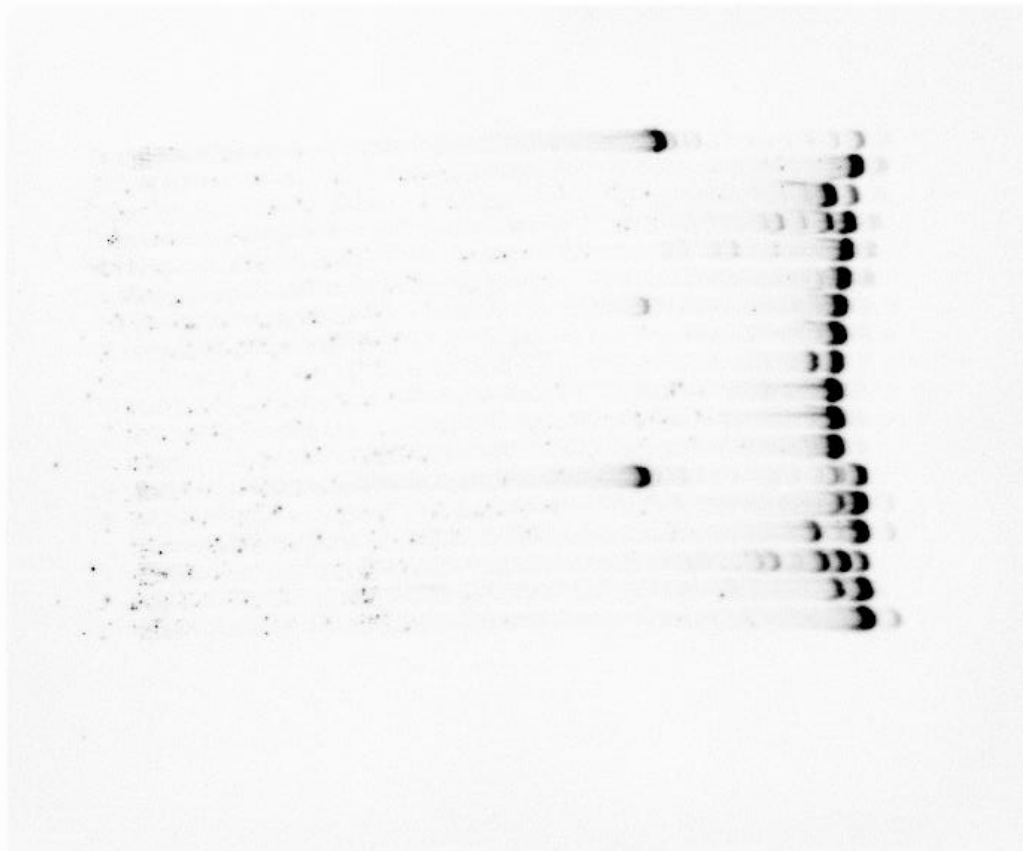

Figure 4B

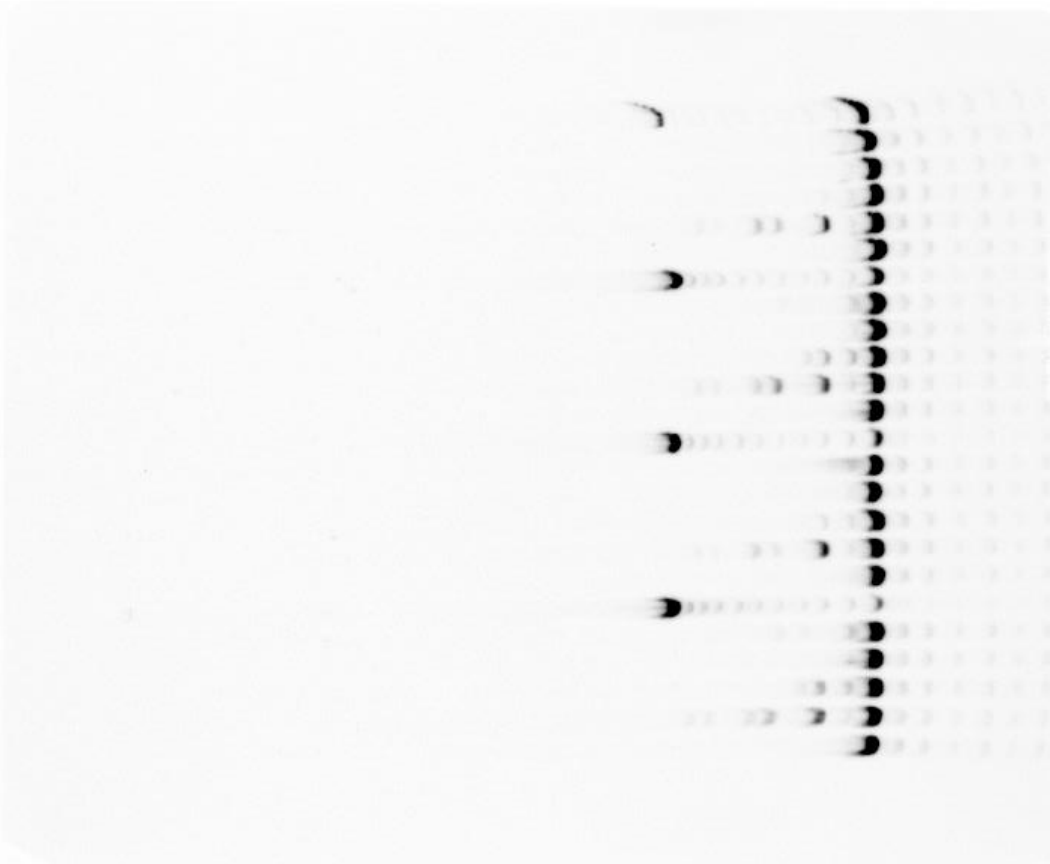

Figure 5A

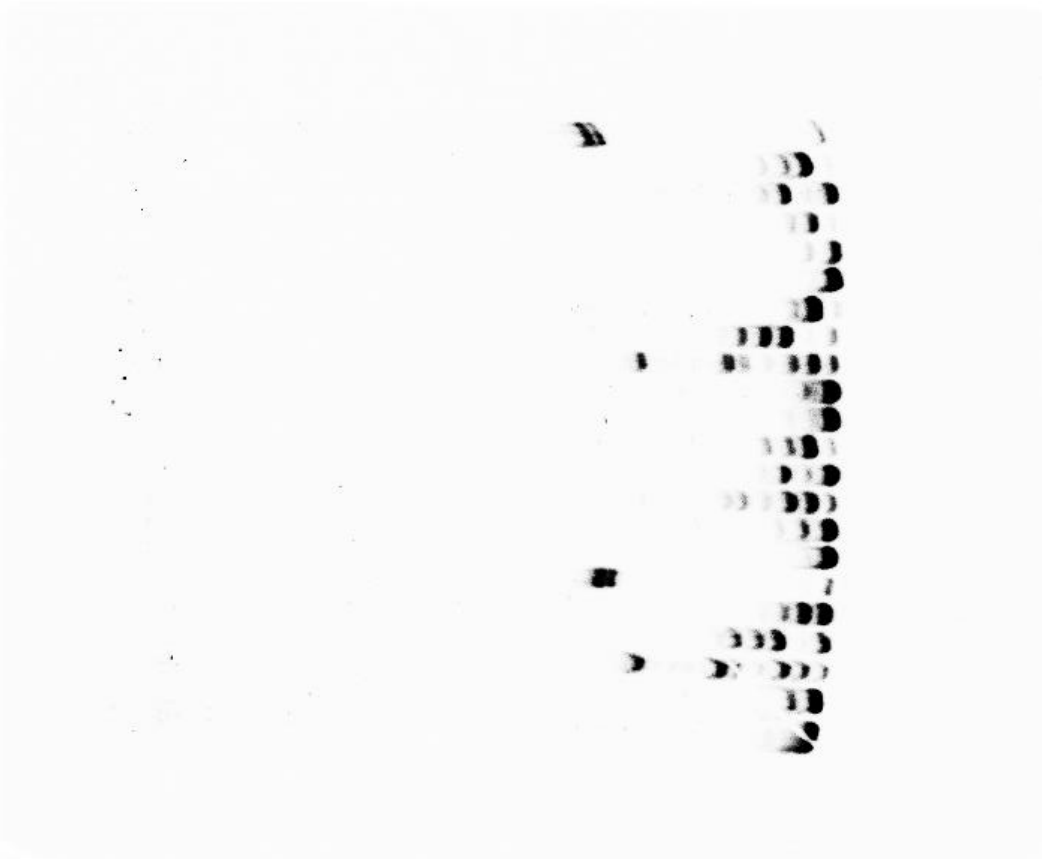

Figure 6



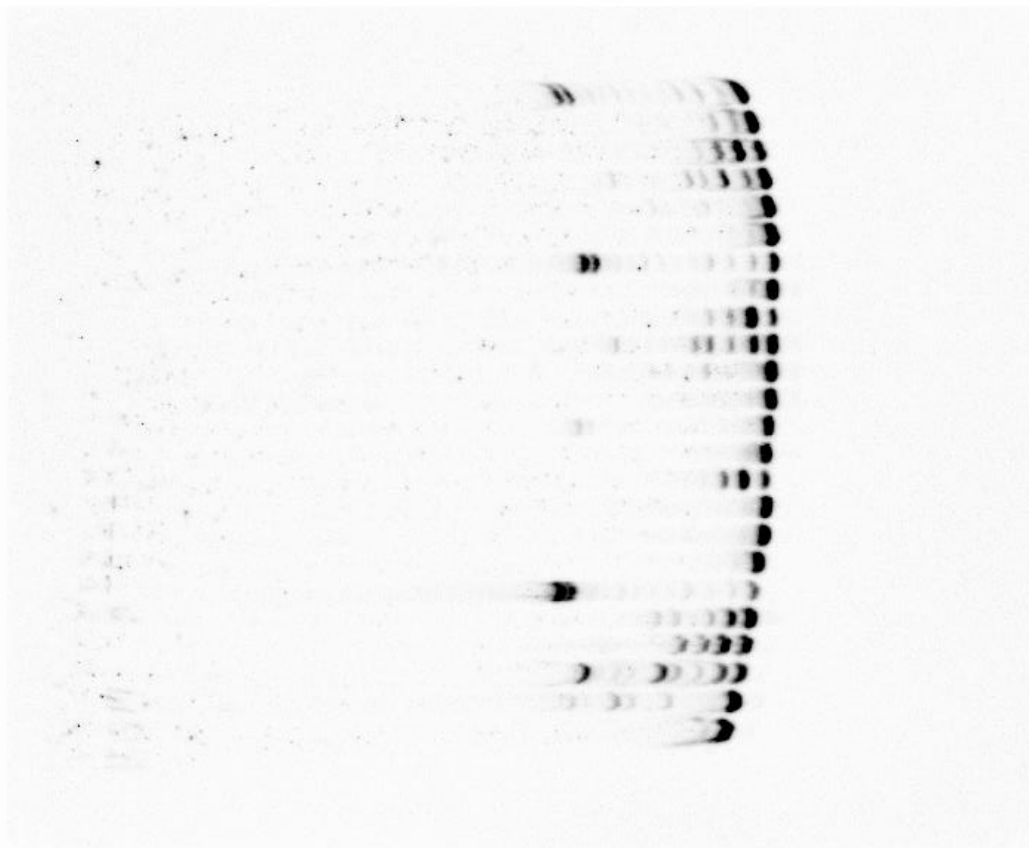

Figure 7A

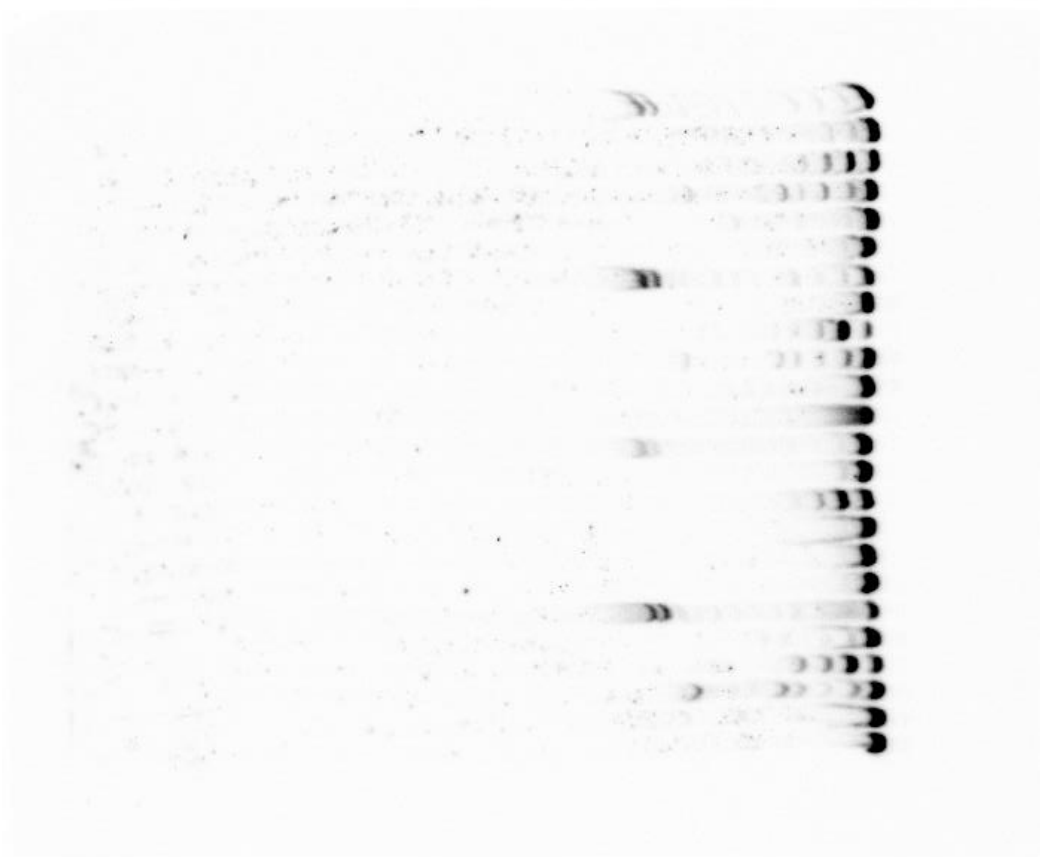

Figure 7B

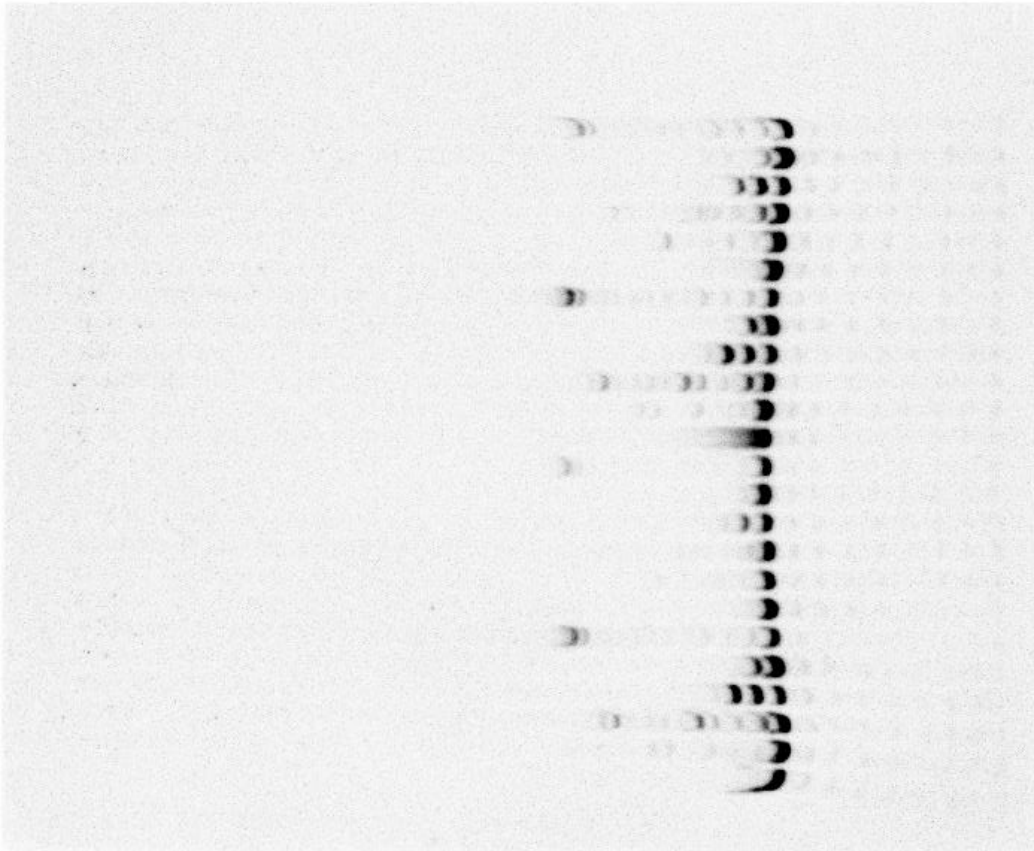

Figure 7C

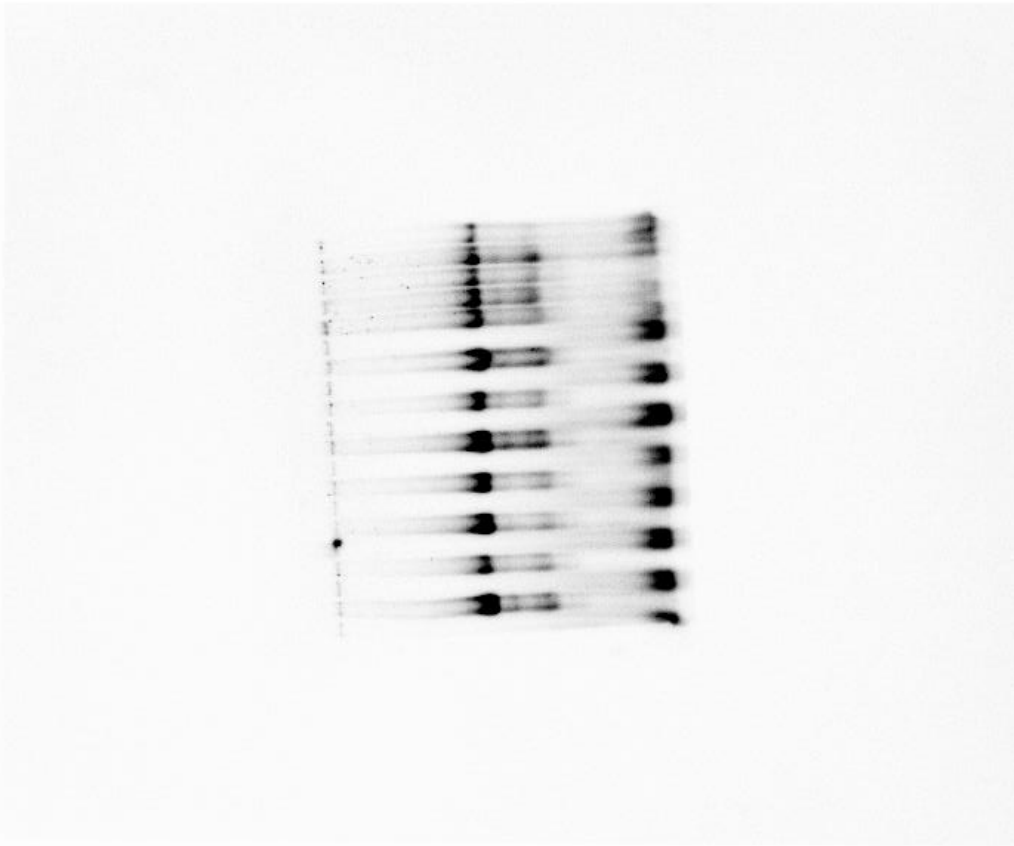

S6 File

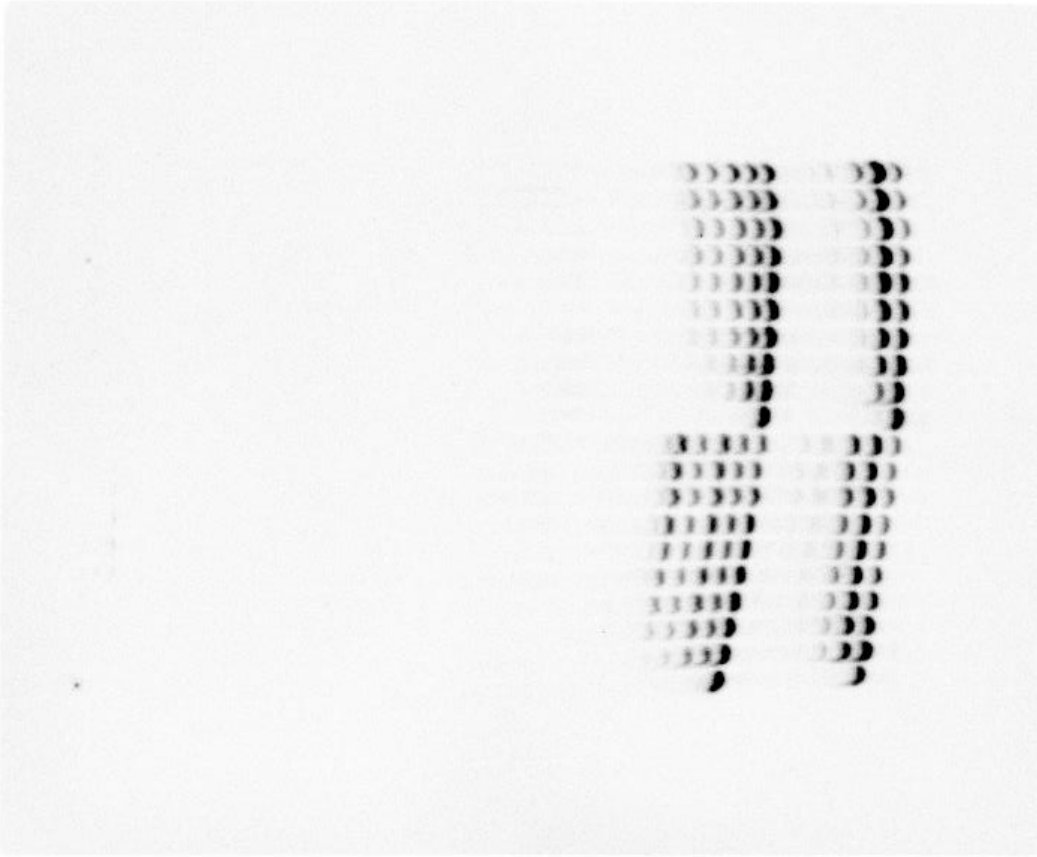

S7 FileA

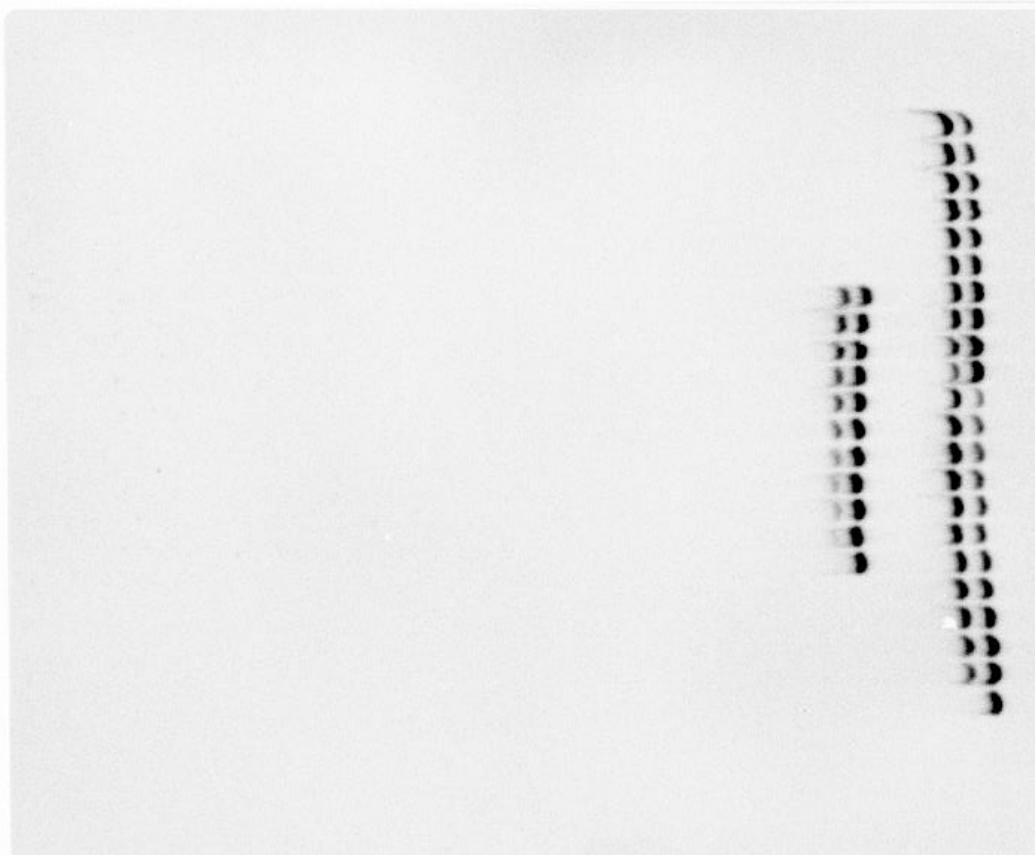

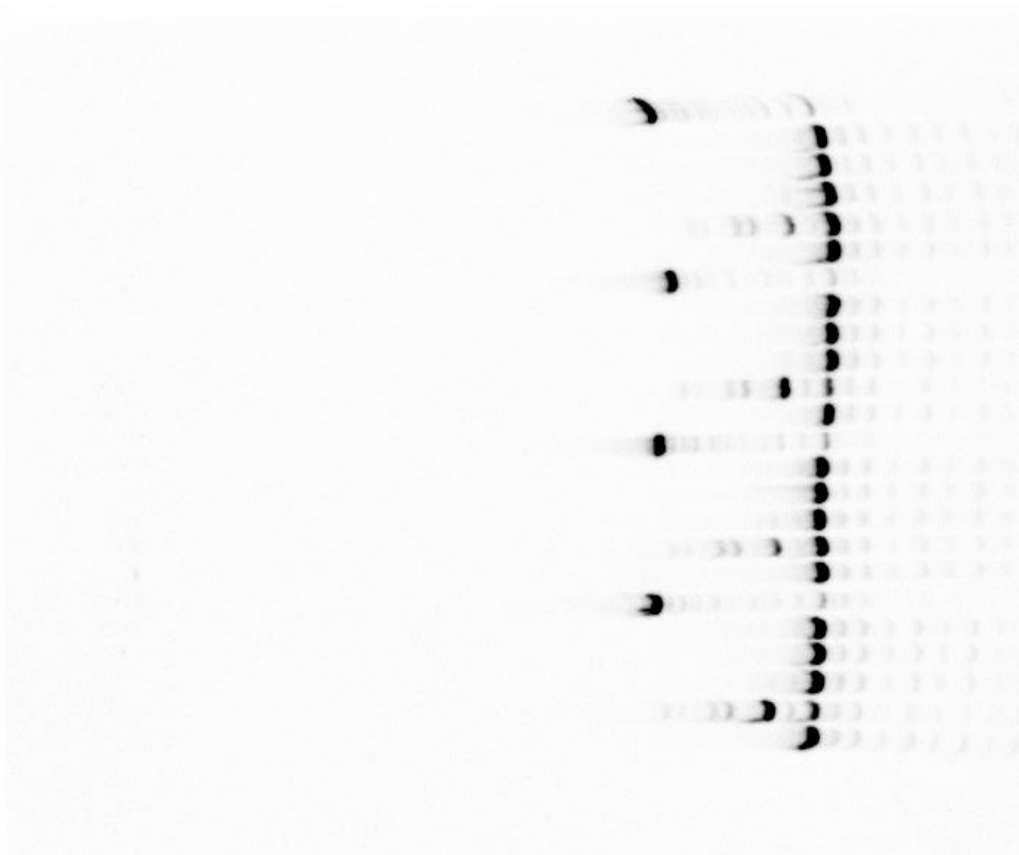

S8 File

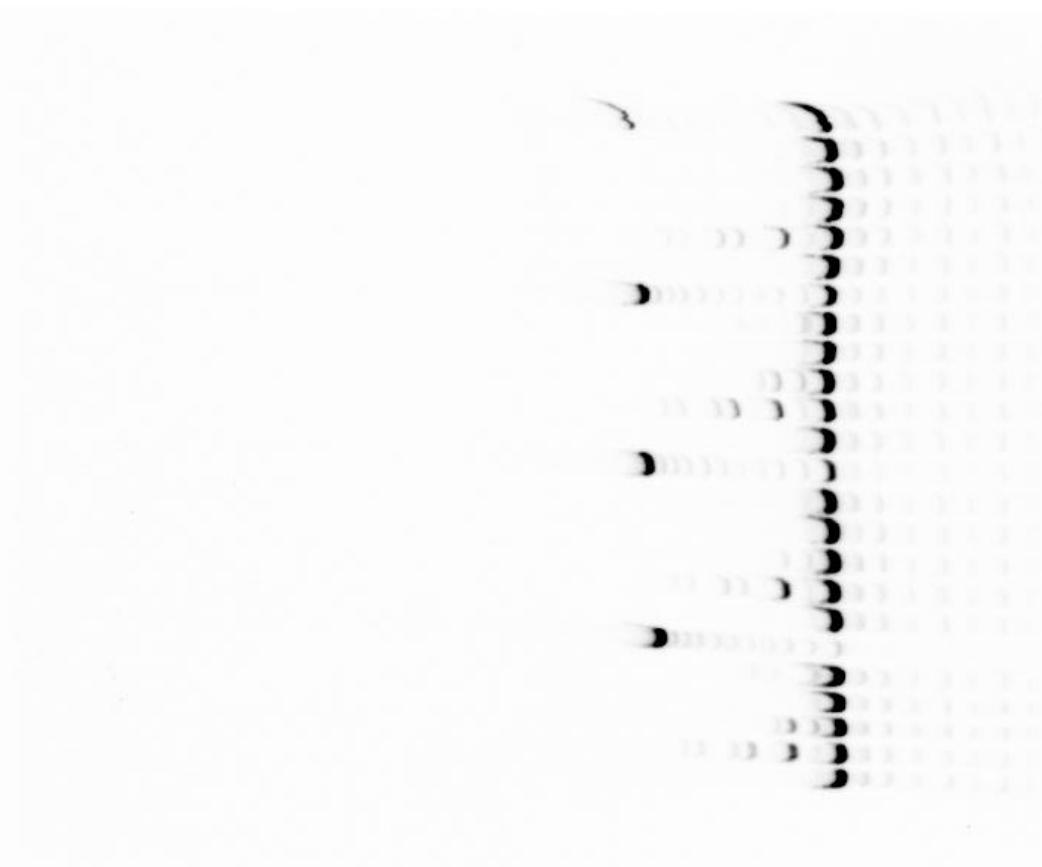



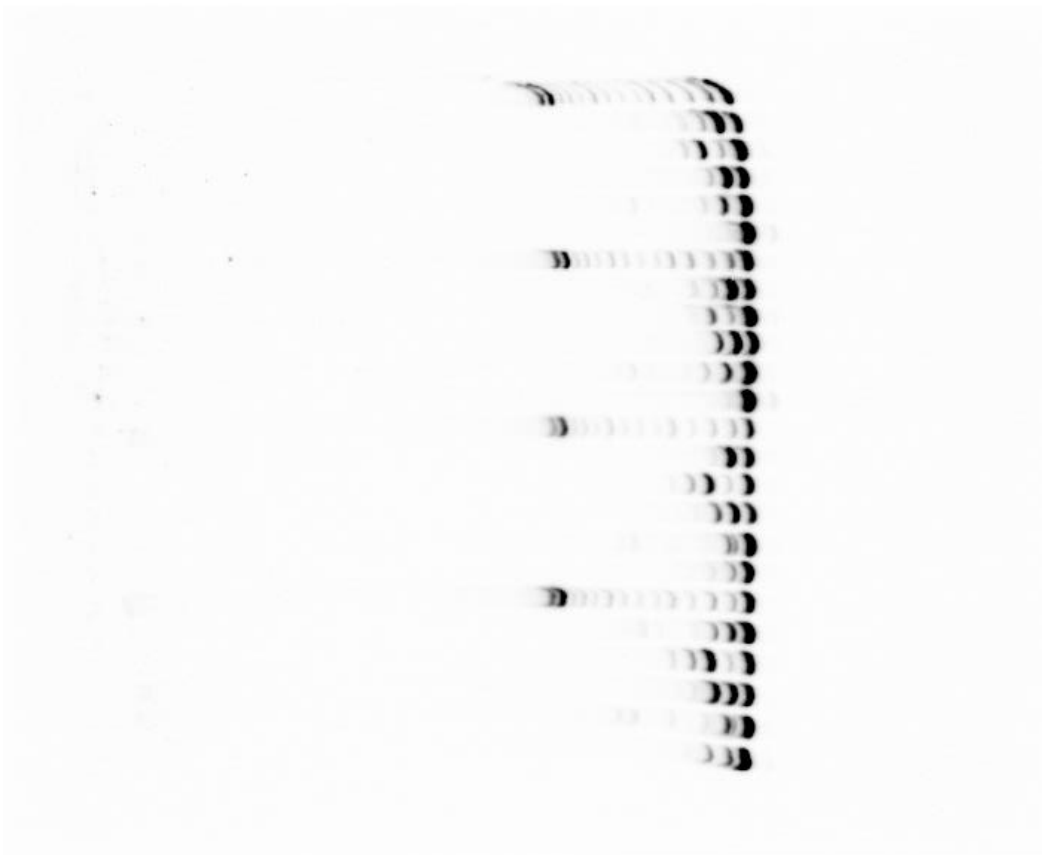

S10 File-top

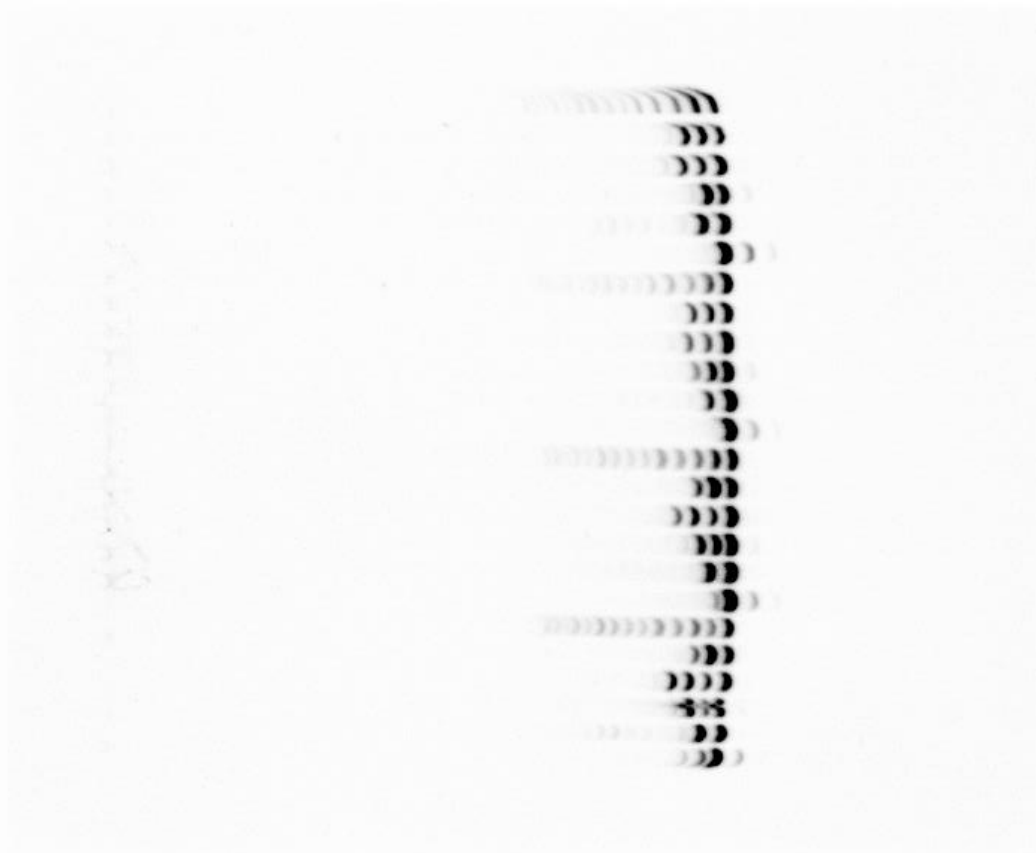

S10 File 2<sup>nd</sup> top, pH 7.3

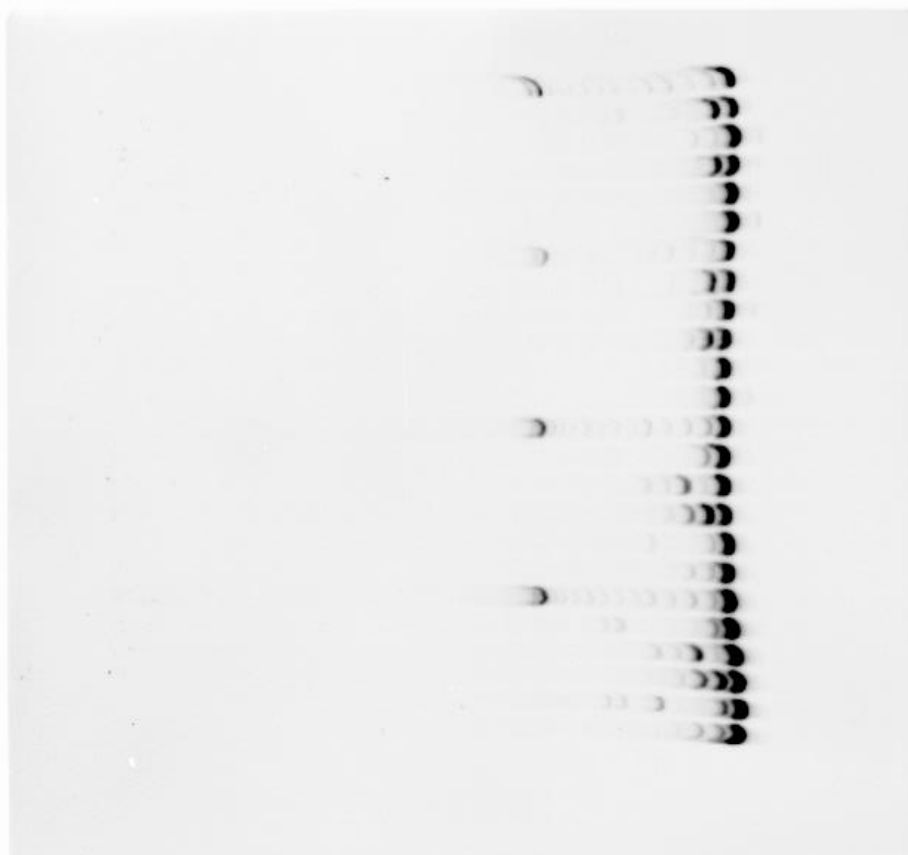

S10 File 3<sup>rd</sup> top

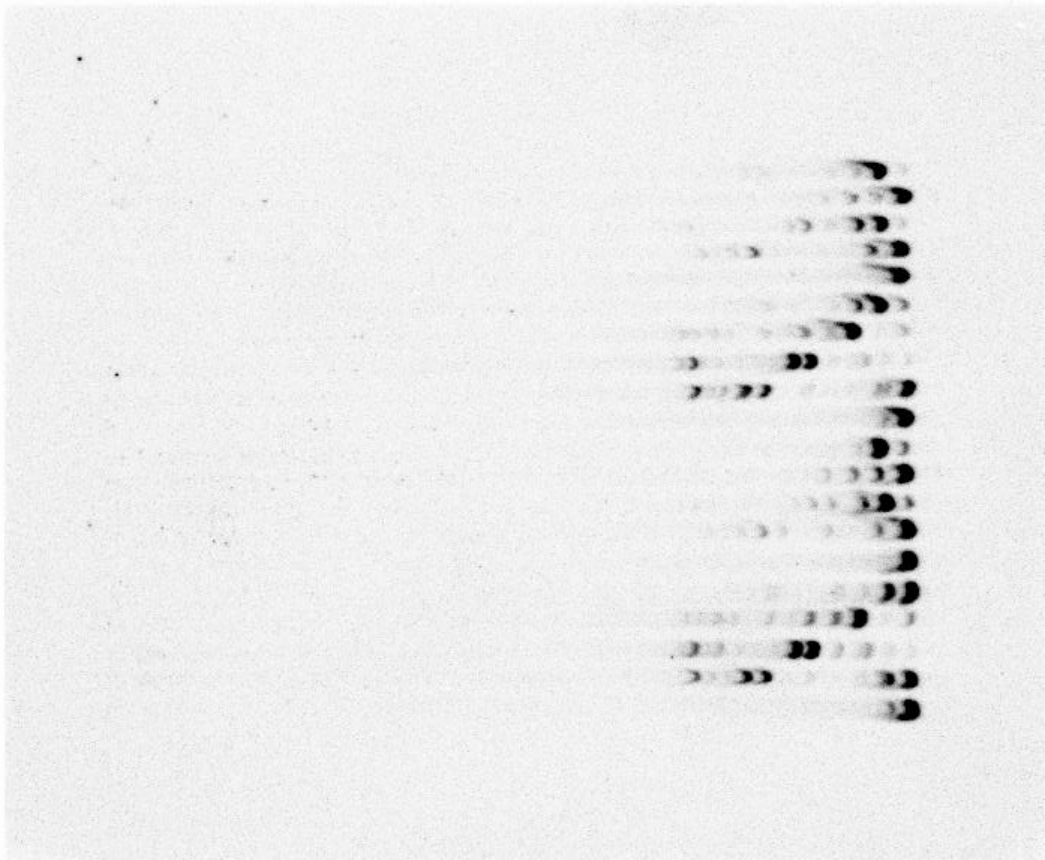

S11 File top

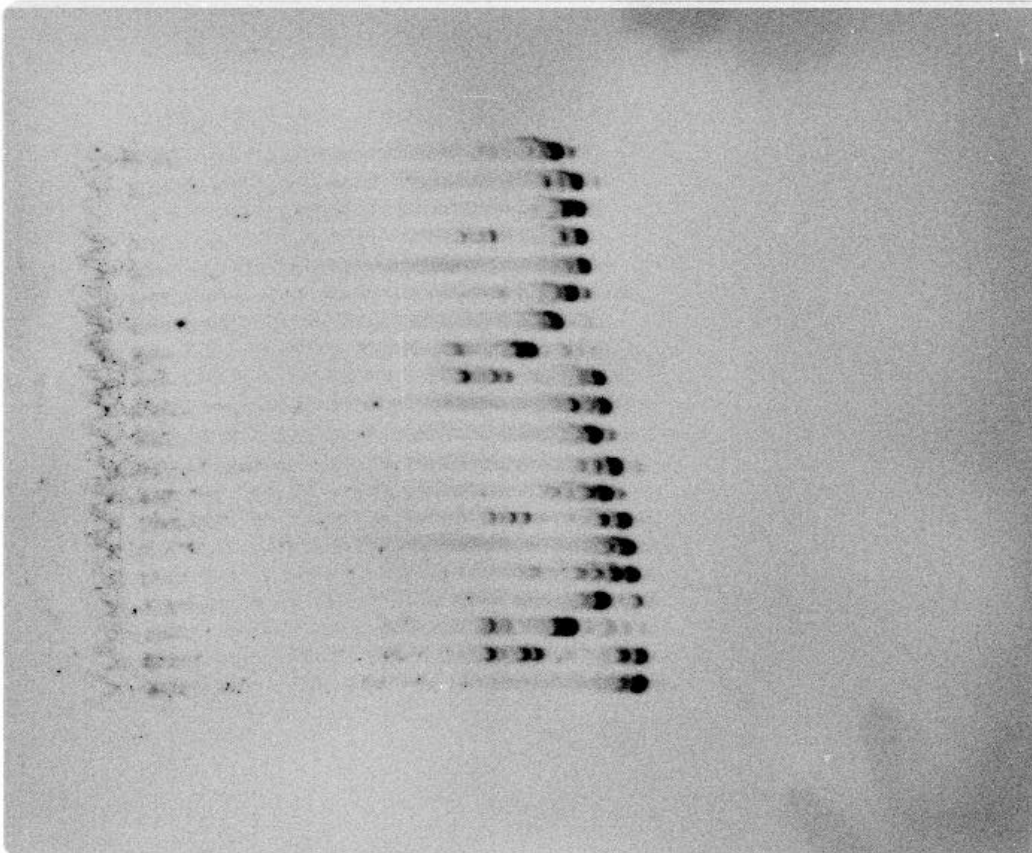

S11 Filebottom

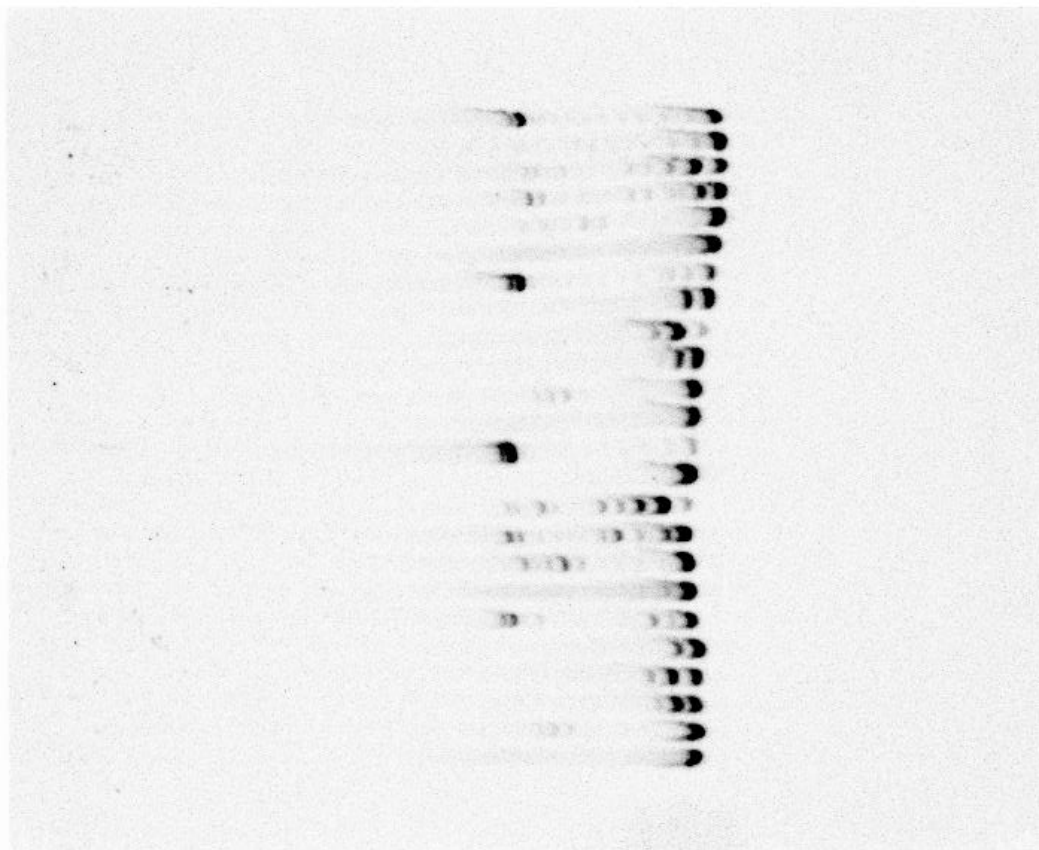

S11 File top – 2<sup>nd</sup> page

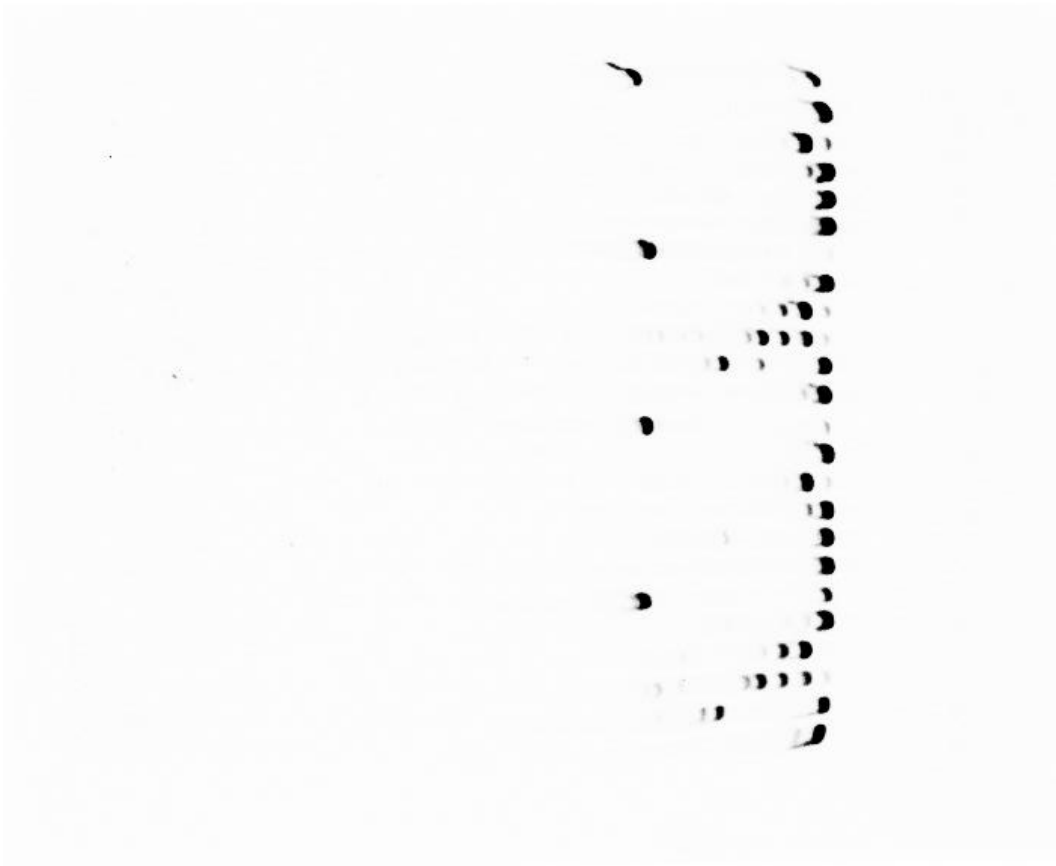

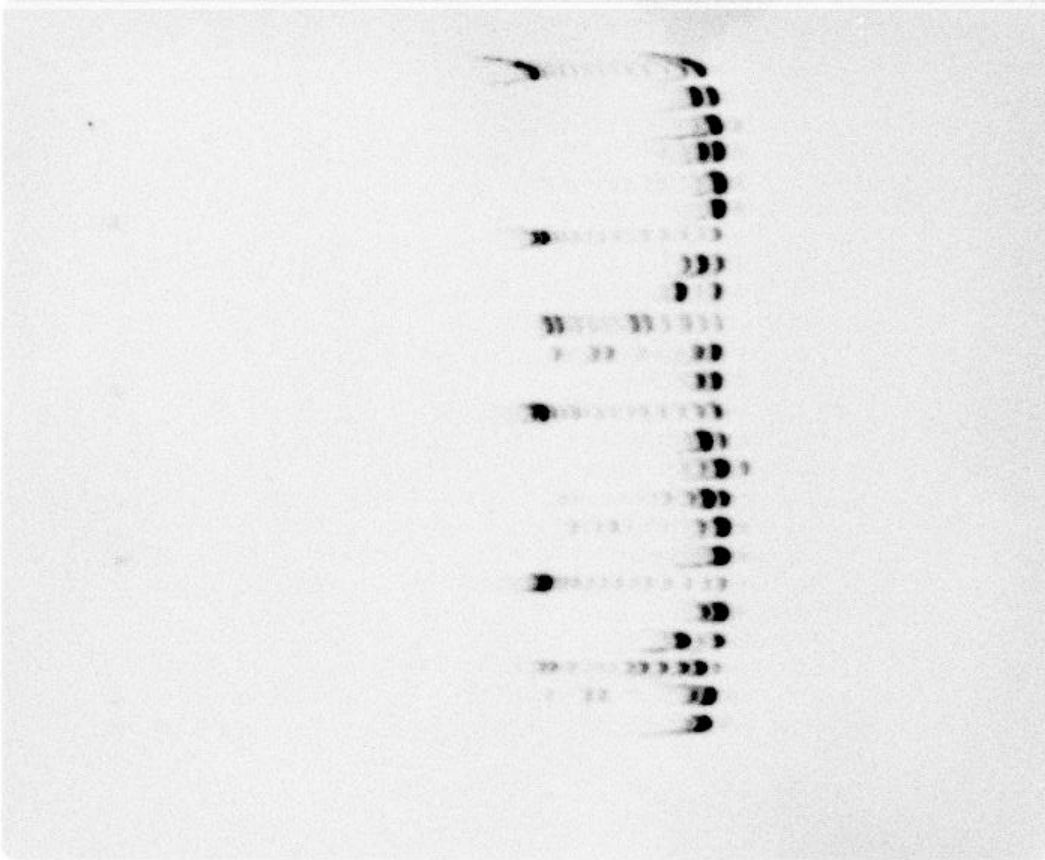

S12 File



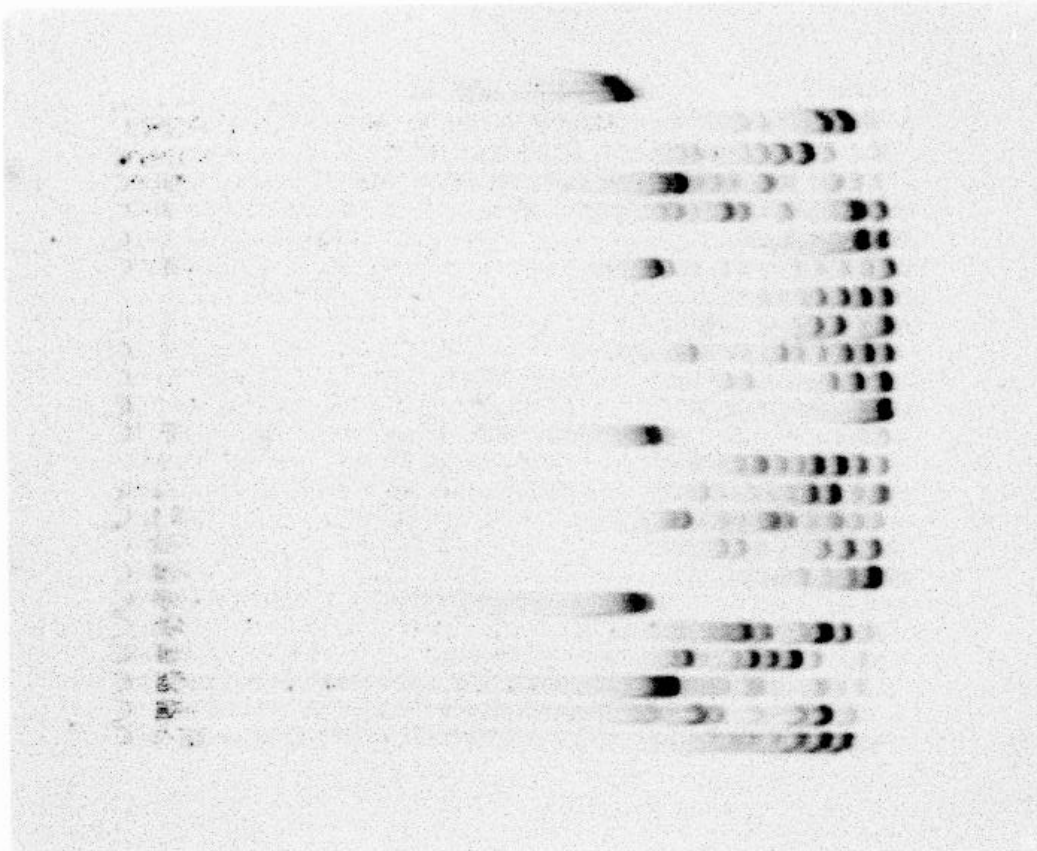

S13 File

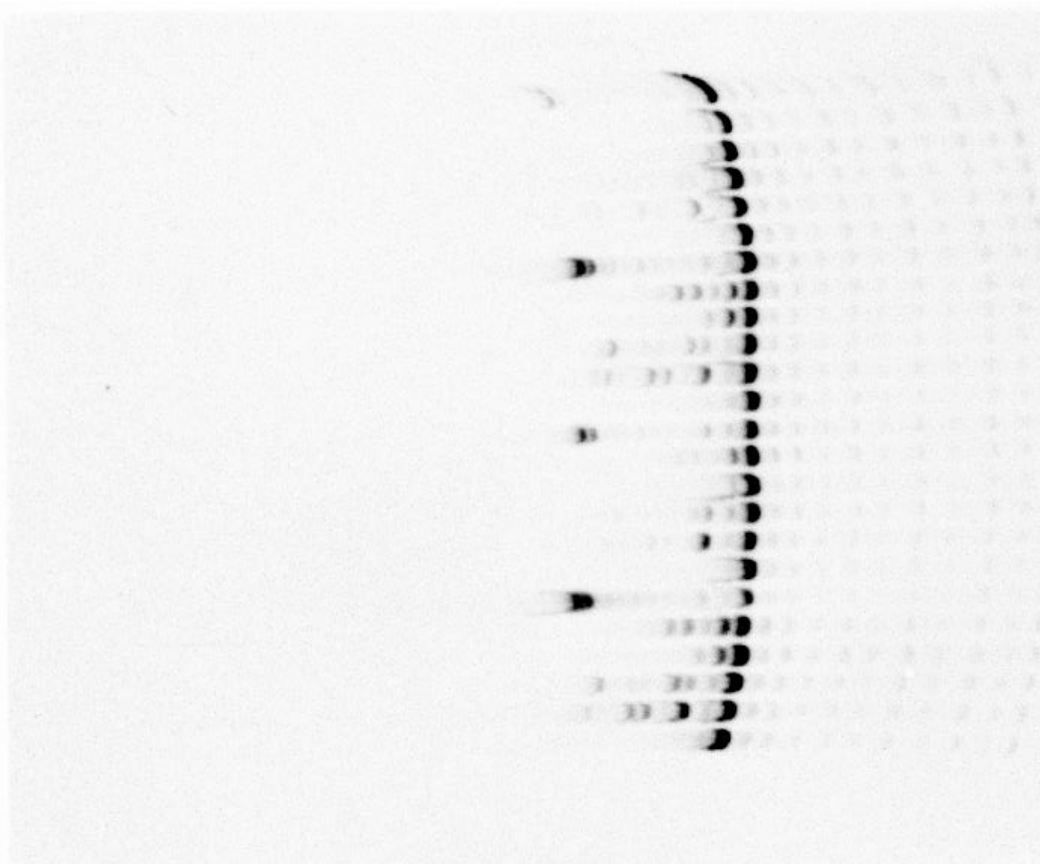

S14 File top

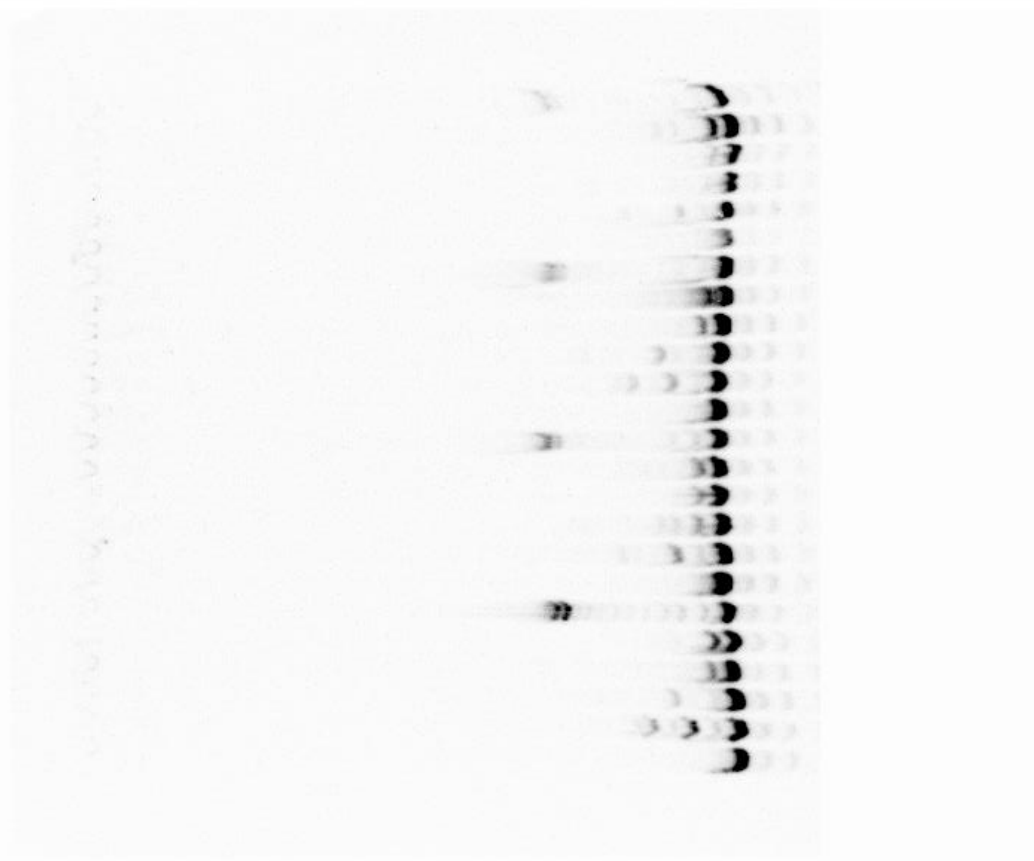

S14 File middle

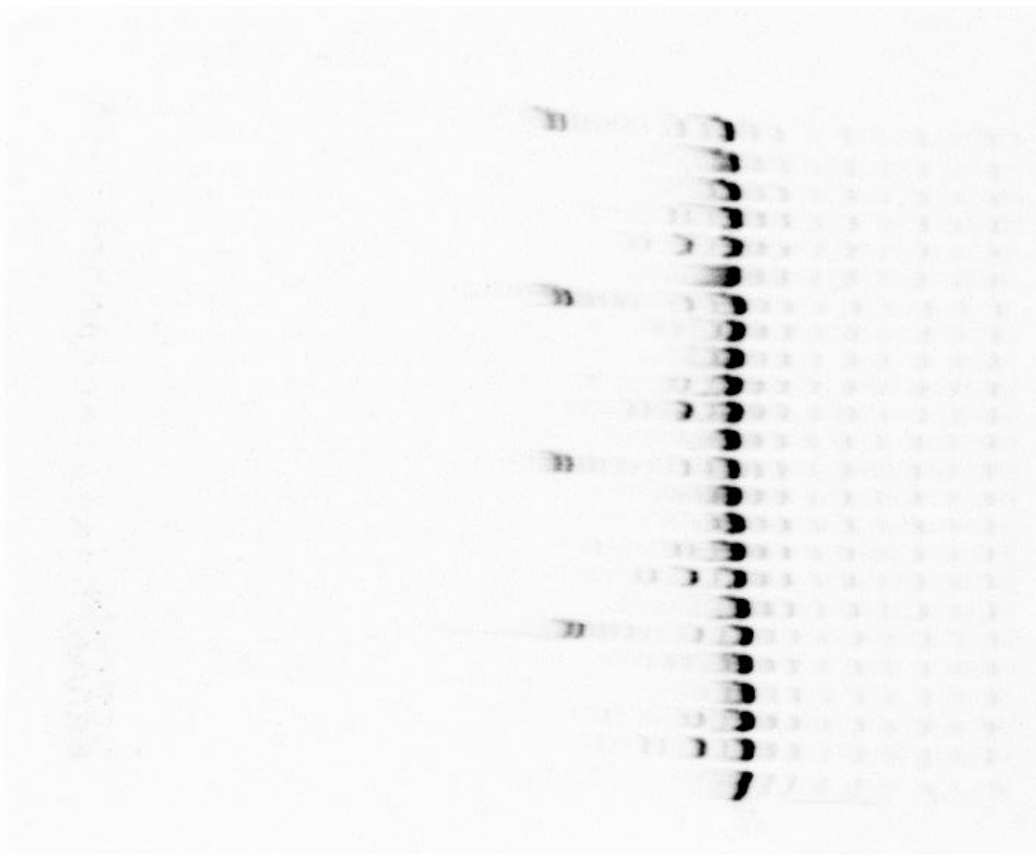

S14 File bottom

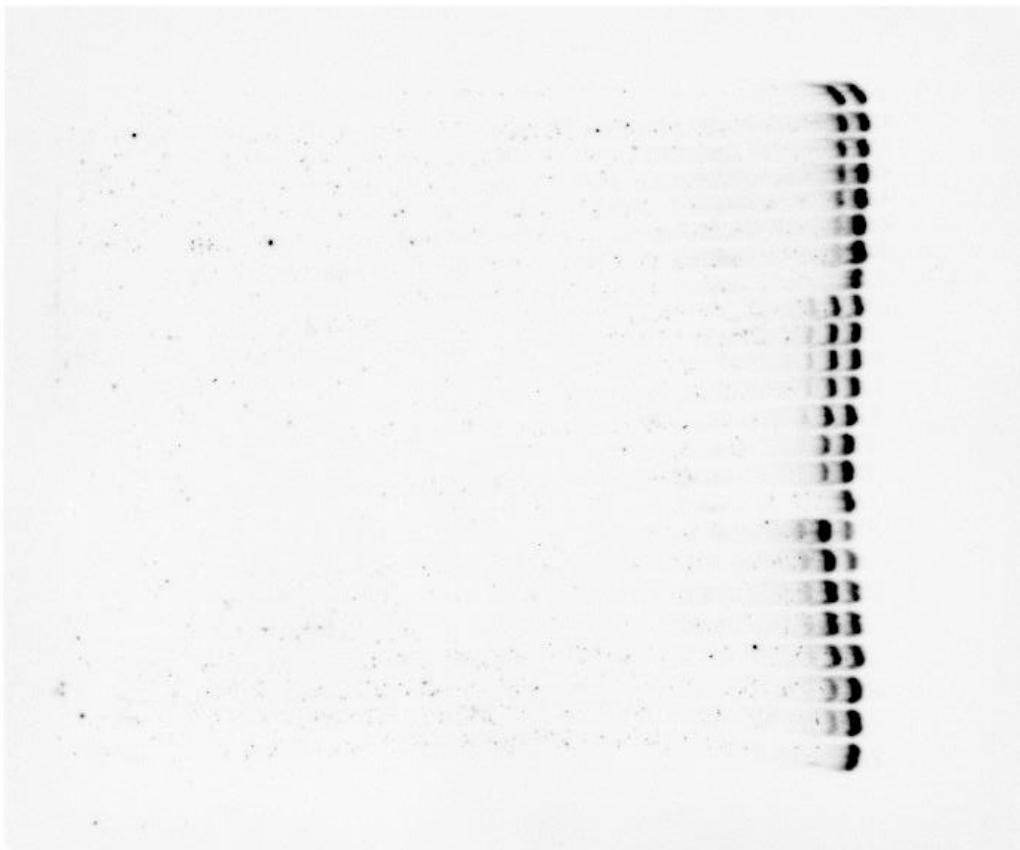

S15 File-A

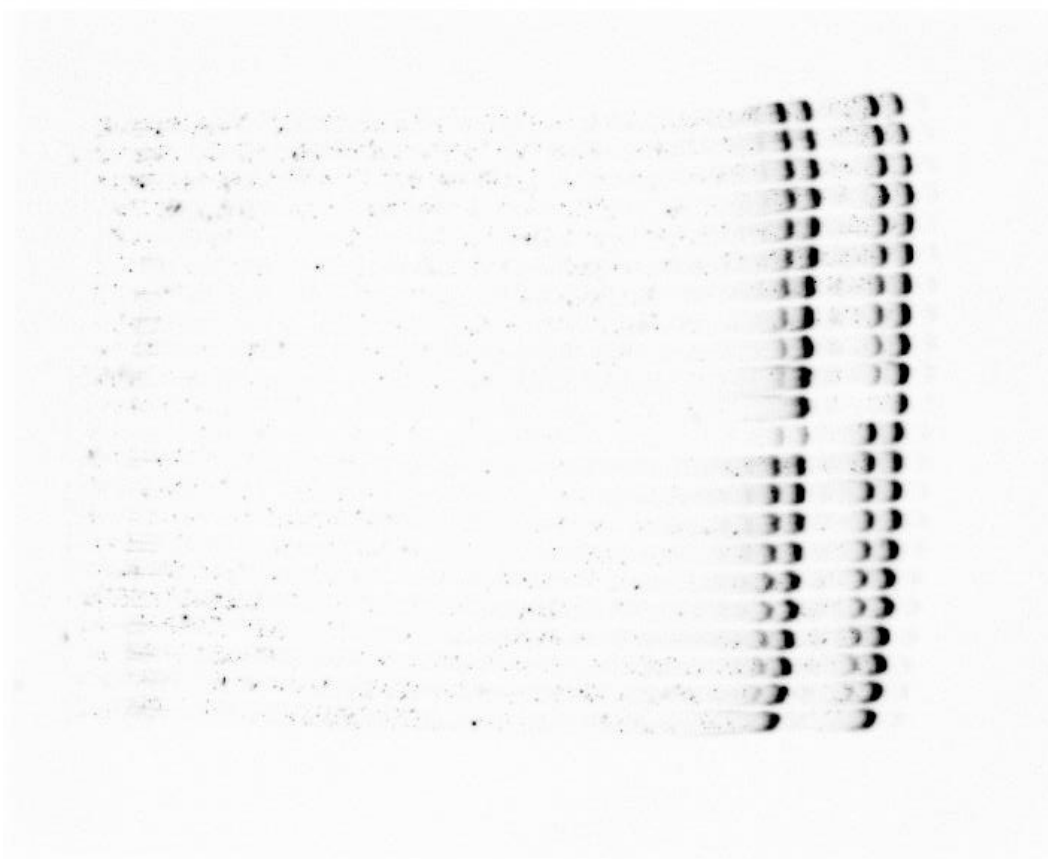

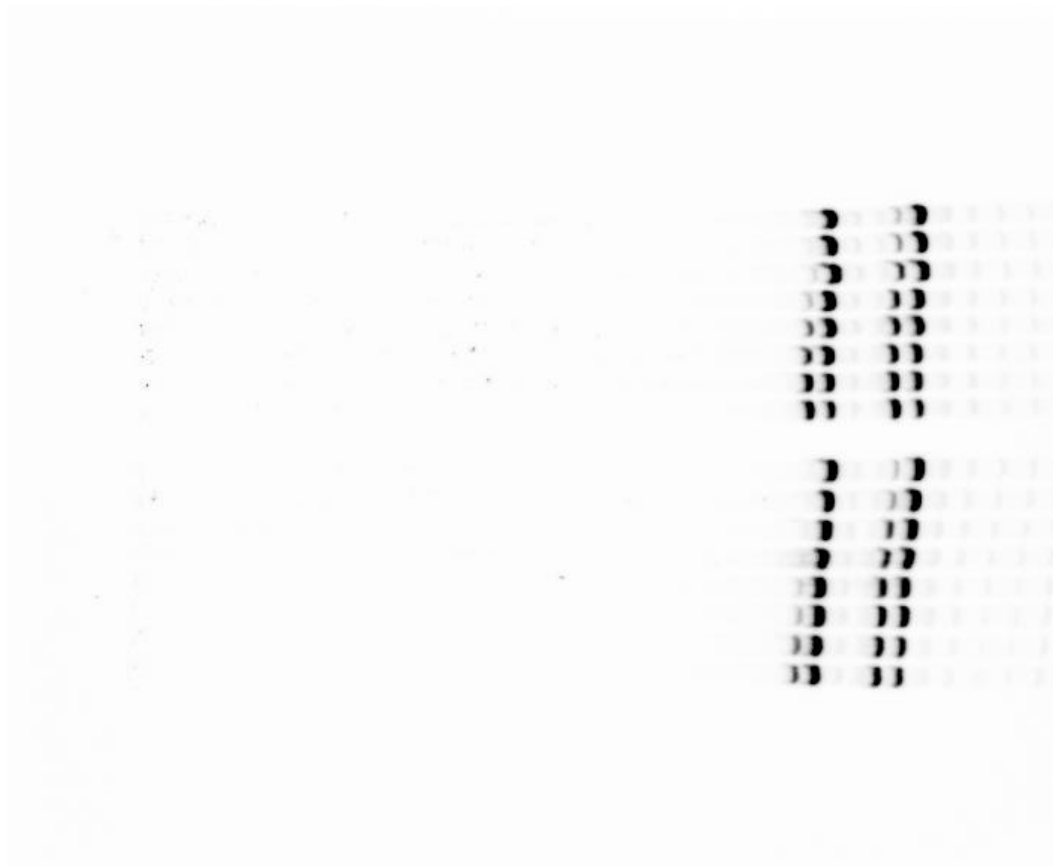

Supplement: pone.0235102.s017.pdf [file pone.0235102.s017.pdf]
