# Supplementary material for: Translesion synthesis by AMV, HIV, and MMLVreverse transcriptases using RNA templates containing inosine, guanosine, and their 8-oxo-7,8-dihydropurine derivatives
Source: PubMed Central journal article supplement (PMC7455023; doi:10.1371/journal.pone.0235102), 2020-08-28
Supplement: pone.0235102.s004.pdf [file pone.0235102.s004.pdf]

HIV RT, 10-fold dilution

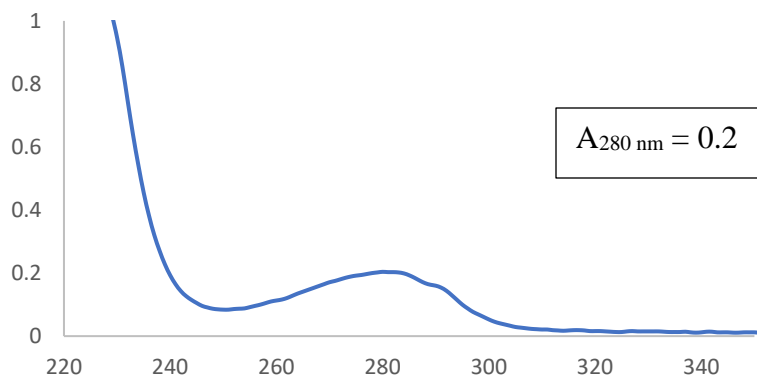

AMV RT- neat

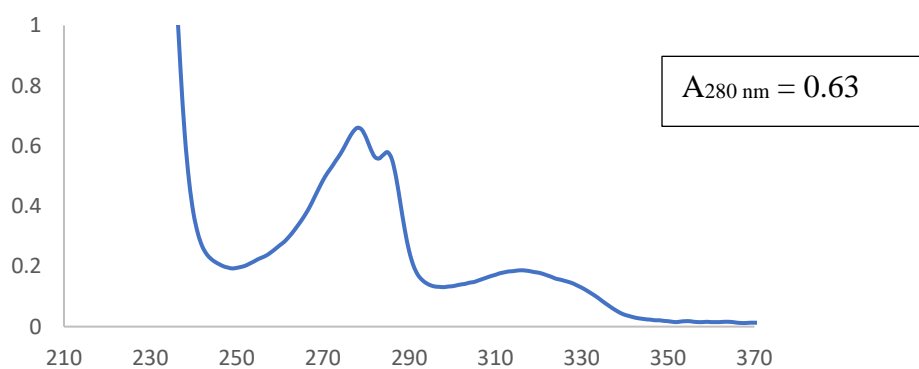

MMLV RT, neat

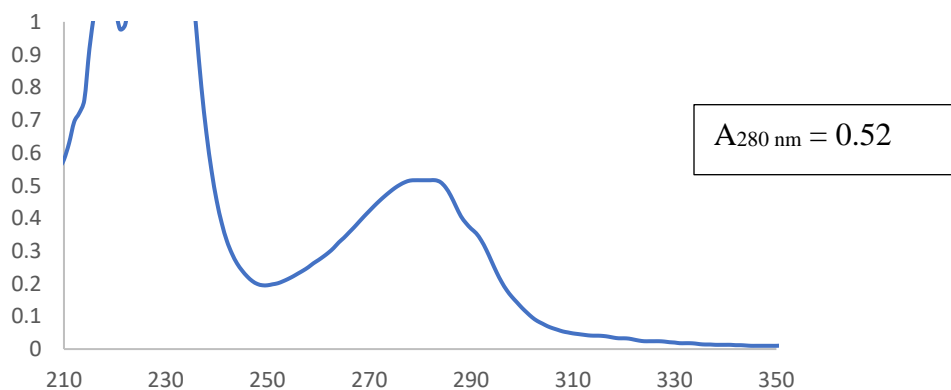

**S4 File.** UV-vis spectra of HIV, MMLV, and AMV RTs.

Conditions: HIV RT - 0.5 mM Tris-acetate, 0.75 mM Potassium Acetate, 0.08 mM Magnesium Acetate, 0.01 mM DTT (pH 8.3); AMV RT - 5 mM Tris-acetate, 7.5 mM Potassium Acetate, 0.8 mM Magnesium Acetate, 1 mM DTT (pH 8.3)\*; MMLV RT - 5 mM Tris-HCl, 7.5 mM KCl, 0.3 mM  $\text{MgCl}_2$ , 1 mM DTT (pH 8.3).

\* Absorbance at 320 nm can be attributed to scattering.<sup>5</sup>

(5) McGaughey, R. W.; Murray, F. A. Properties of blastokinin: Amino acid composition, evidence for subunits, and estimation of isoelectric point.
