# Supplementary material for: Translesion synthesis by AMV, HIV, and MMLVreverse transcriptases using RNA templates containing inosine, guanosine, and their 8-oxo-7,8-dihydropurine derivatives
Source: PubMed Central journal article supplement (PMC7455023; doi:10.1371/journal.pone.0235102), 2020-08-28
Supplement: pone.0235102.s005.pdf [file pone.0235102.s005.pdf]

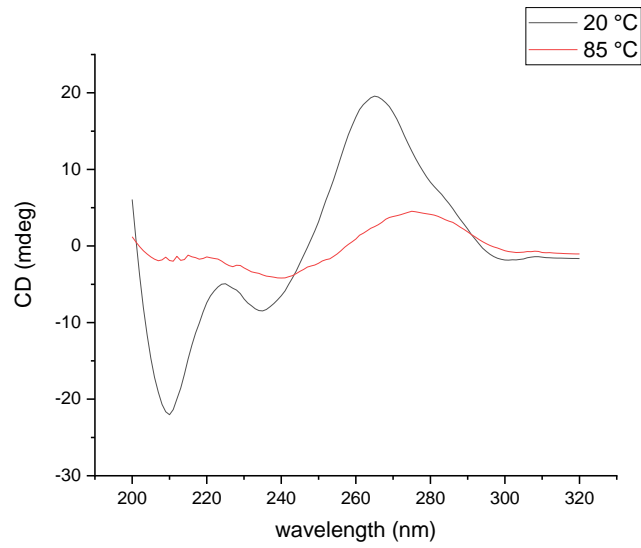

Typical CD spectrum of annealed duplex at 20 °C and denatured duplex at 85 °C

**Experimental conditions:** 1.5  $\mu\text{M}$  RNA and 2.0  $\mu\text{M}$  complement DNA prepared in PBS (10 mM NaCl, 5 mM MgCl<sub>2</sub>, 1 mM Na<sub>2</sub>HPO<sub>4</sub> pH 7.2)

1 - 4 & 9      3'- CUC CAC ACA UCC ACC ACX ACC UCA ACU GU  
 5' - HOP\*(O)<sub>3</sub> - GAG GTG TGT AGG TGG TG  
 3'- CUC CAC ACA UCC ACC ACX ACC UCA ACU GU  
 5' - HOP\*(O)<sub>3</sub> - GAG GTG TGT AGG TGG TGY  
 3'- CUC CAC ACA UCC ACC ACX ACC UCA ACU GU  
 5' - HOP\*(O)<sub>3</sub> - GAG GTG TGT AGG TGG TGY U

X = 1 - G; 2 - I; 3 - 8-oxoG; 4 - 8-oxoI; 9 - 8-BrI  
 Y = 6 - dA; 7 - dC; 8 - dT  
 Y = 10 - dA; 11 - dC

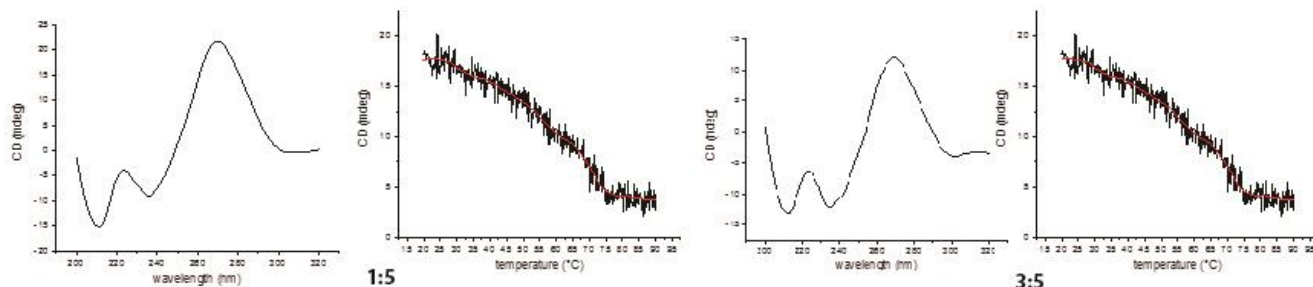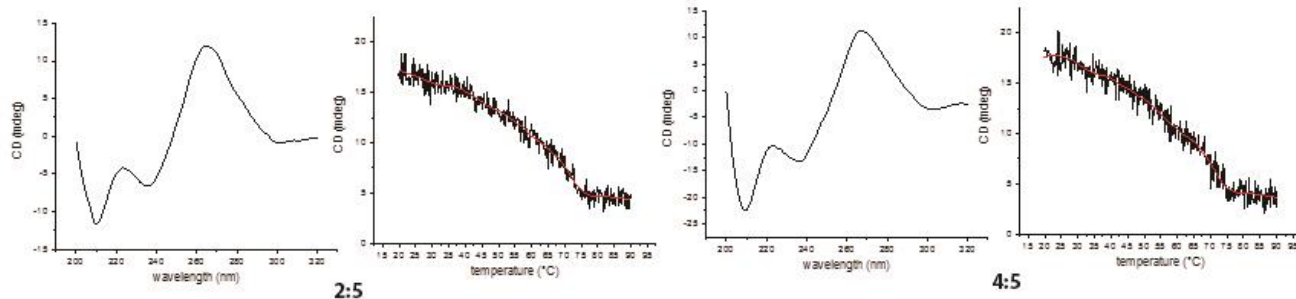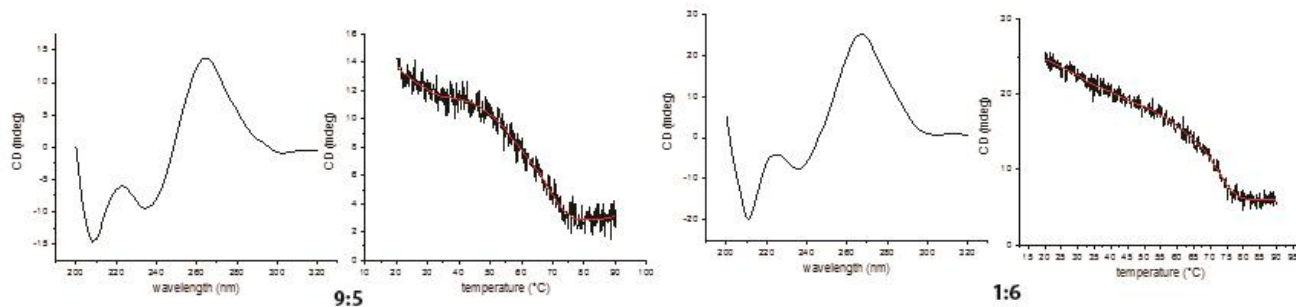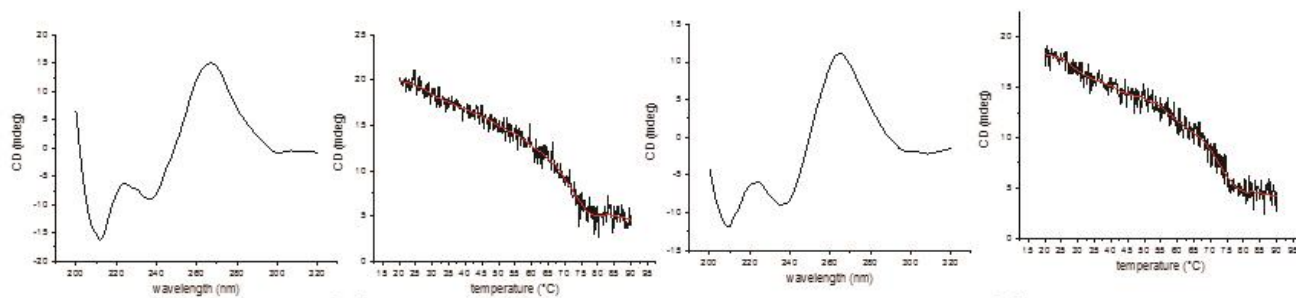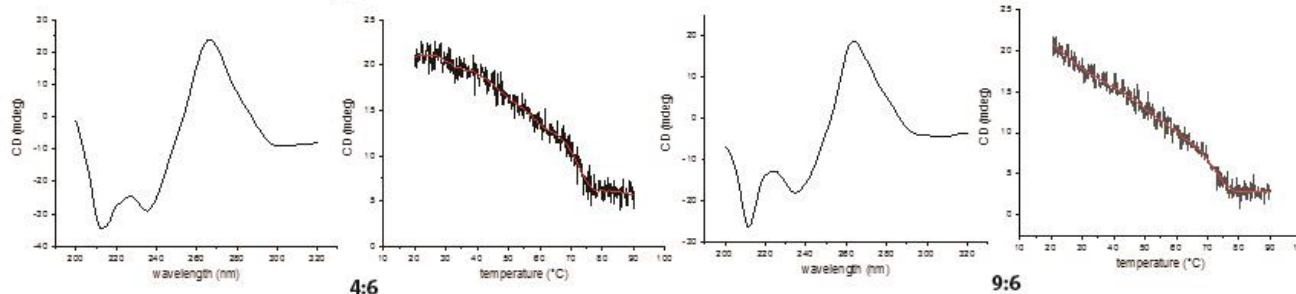

CD and T<sub>m</sub> measurement for duplexes 1:5 - 4:5; 1:6-4:6; and 9:5, 9:6.

**1 - 4 & 9**      3'- CUC CAC ACA UCC ACC ACX ACC UCA ACU GU  
 5' - HOP<sup>2</sup>(O)<sub>3</sub> - GAG GTG TGT AGG TGG TG  
 3'- CUC CAC ACA UCC ACC ACX ACC UCA ACU GU  
 5' - HOP<sup>2</sup>(O)<sub>3</sub> - GAG GTG TGT AGG TGG TGY  
 3'- CUC CAC ACA UCC ACC ACX ACC UCA ACU GU  
 5' - HOP<sup>2</sup>(O)<sub>3</sub> - GAG GTG TGT AGG TGG TGY U

**X = 1 - G; 2 - I; 3 - 8-oxoG; 4 - 8-oxoI; 9 - 8-BrI**

**Y = 6 - dA; 7 - dC; 8 - dT**

**Y = 10 - dA; 11 - dC**

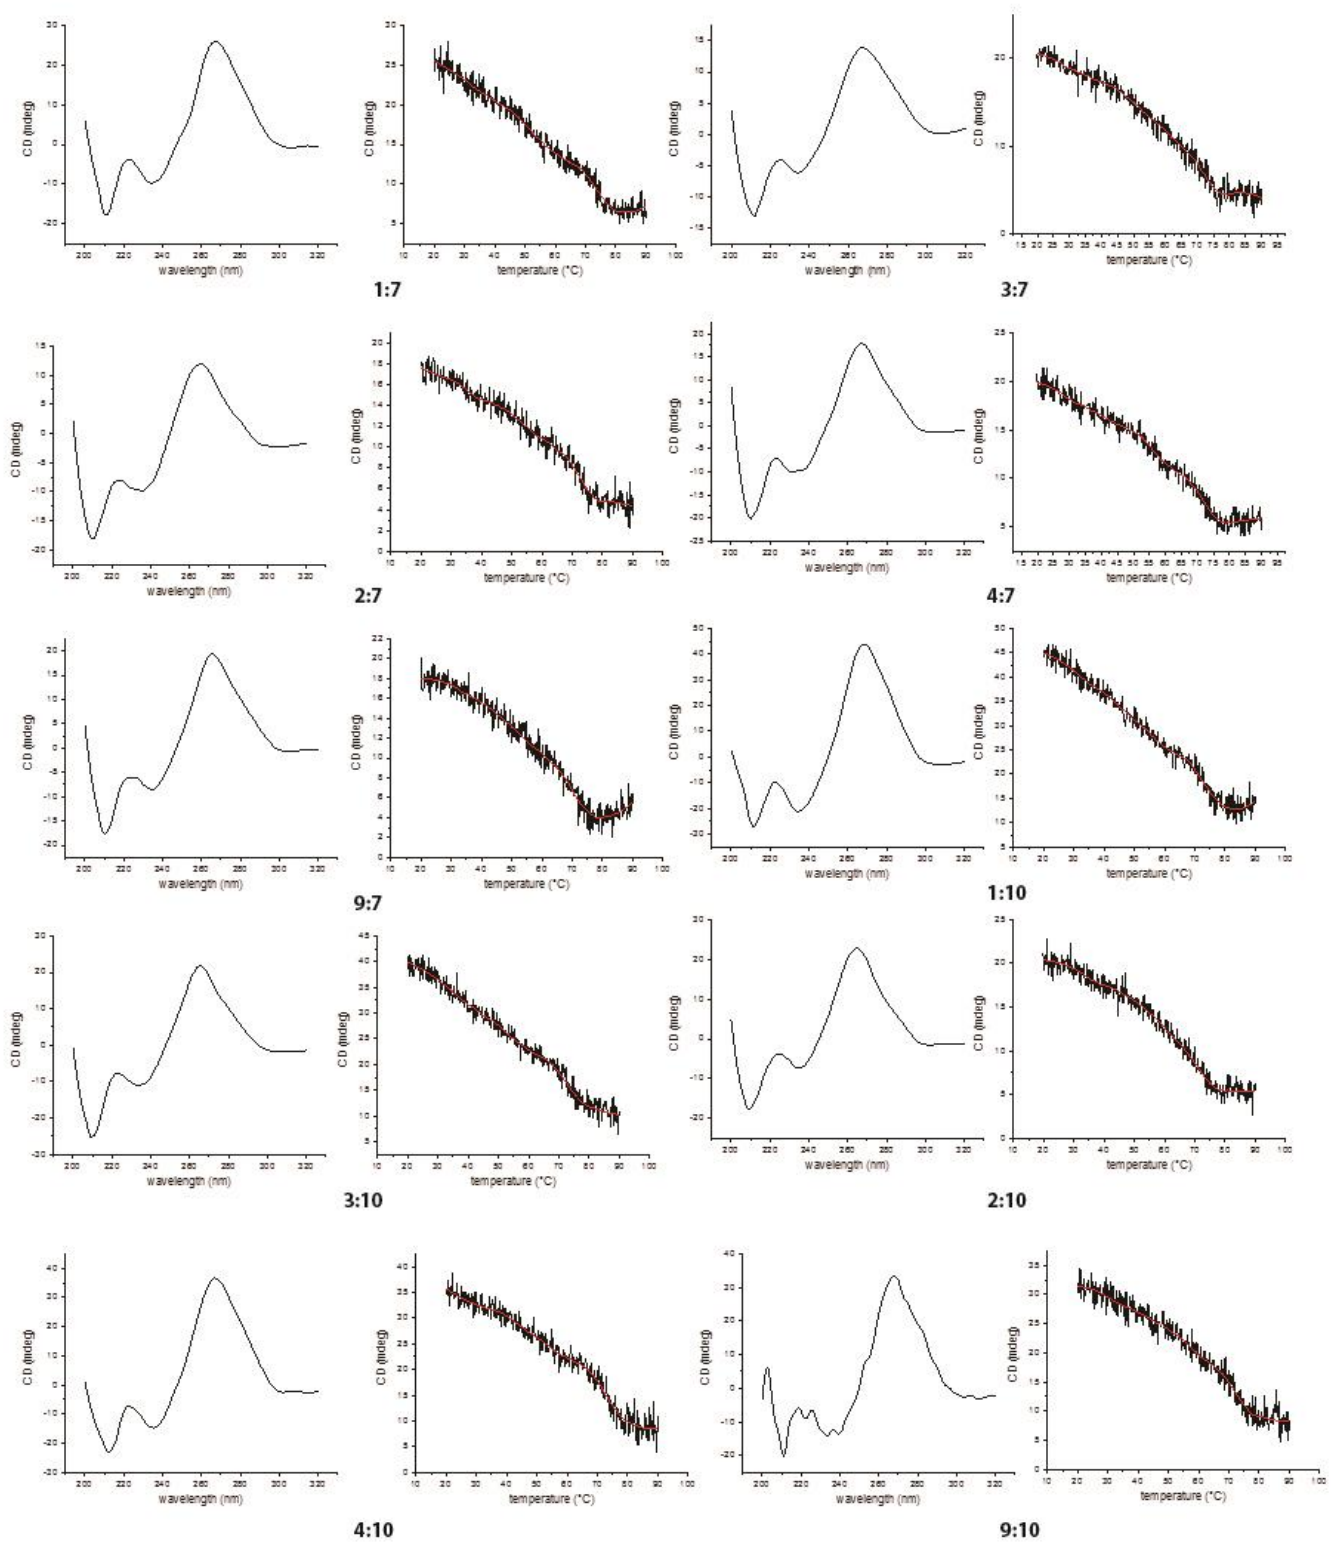

CD and T<sub>m</sub> measurement for duplexes **1:7 - 4:7; 1:10-4:10; and 9:7, 9:10.**

1-4 & 9      3'-CUC CAC ACA UCC ACC ACX ACC UCA ACU GU  
 5' - HOP\*(O)<sub>3</sub> - GAG GTG TGT AGG TGG TG

3'-CUC CAC ACA UCC ACC ACX ACC UCA ACU GU  
 5' - HOP\*(O)<sub>3</sub> - GAG GTG TGT AGG TGG TGY

3'-CUC CAC ACA UCC ACC ACX ACC UCA ACU GU  
 5' - HOP\*(O)<sub>3</sub> - GAG GTG TGT AGG TGG TGY U

X = 1 - G; 2 - I; 3 - 8-oxoG; 4 - 8-oxoI; 9 - 8-BrI

Y = 6 - dA; 7 - dC; 8 - dT

Y = 10 - dA; 11 - dC

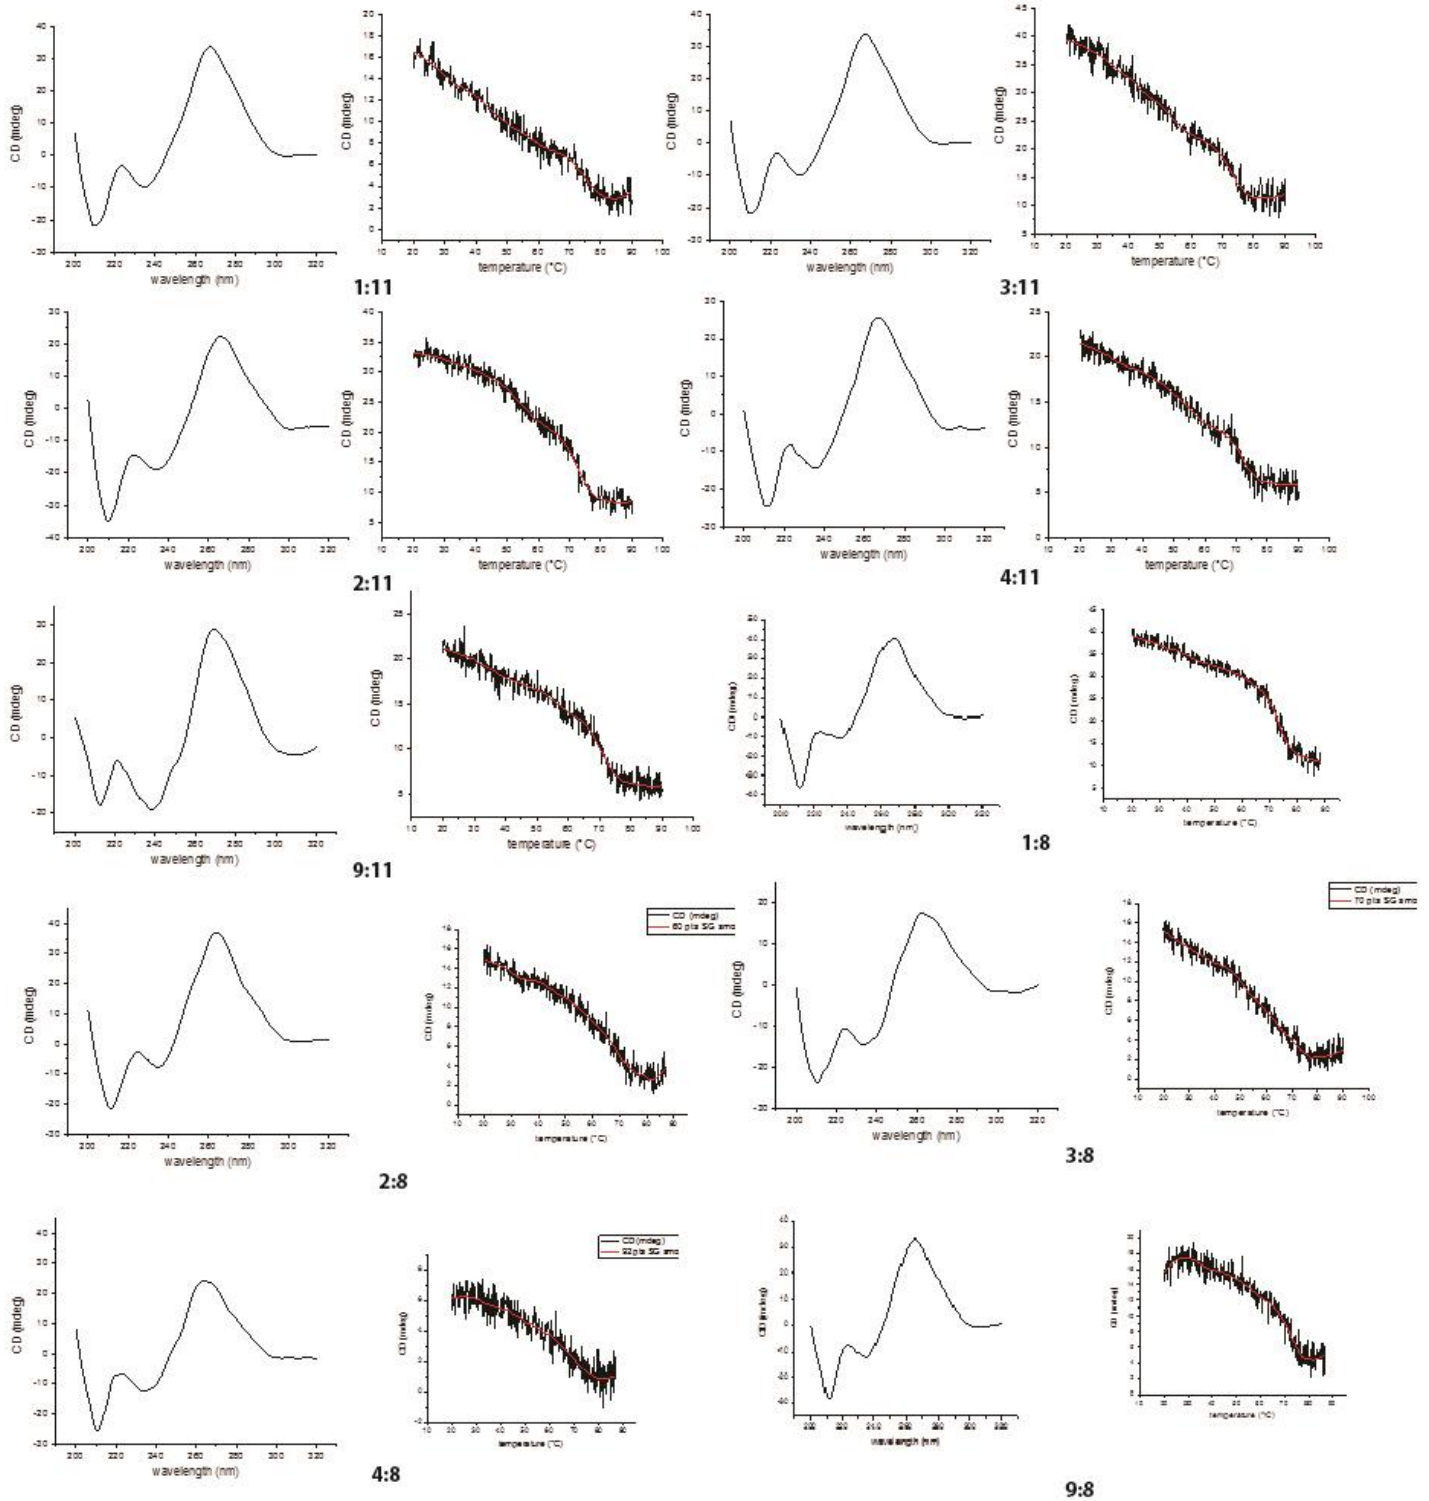

CD and T<sub>m</sub> measurement for duplexes 1:11 - 4:11; 9:11; 1:8 - 4:8; and 9:8

| 5'-CUC-CAC-ACA-UCC-ACC-ACG-ACC-UCA-ACU-CU-3' |          |          |          |          |          |          |      | Duplex |
|----------------------------------------------|----------|----------|----------|----------|----------|----------|------|--------|
|                                              | 1        | 2        | 3        | avg      | std dev  | RSD      |      |        |
| primer1                                      | 69.6     | 70.4     | 70.0     | 70.0     | 0.4      | 0.6%     | 1:5  |        |
| extra A                                      | 71.4     | 72.2     | 72.0     | 71.9     | 0.4      | 0.6%     | 1:6  |        |
| extra C                                      | 74.2     | 72.5     | 73.4     | 73.4     | 0.8      | 1.1%     | 1:7  |        |
| extra T                                      | 72.5     | 71.8     | 72.6     | 72.3     | 0.4      | 0.6%     | 1:8  |        |
| extra AU                                     | 72.8     | 73.4     | 73.6     | 73.3     | 0.4      | 0.6%     | 1:10 |        |
| extra CU                                     | 74.4     | 75.2     | 74.4     | 74.7     | 0.5      | 0.6%     | 1:11 |        |
| Anova: Single Factor                         |          |          |          |          |          |          |      |        |
| SUMMARY                                      |          |          |          |          |          | Duplex   |      |        |
| Groups                                       | Count    | Sum      | Average  | Variance |          |          |      |        |
| primer1                                      | 4        | 280      | 70       | 0.106667 | 1:5      |          |      |        |
| extra A                                      | 4        | 287.4    | 71.85    | 0.111667 | 1:6      |          |      |        |
| extra C                                      | 4        | 293.4    | 73.35    | 0.455    | 1:7      |          |      |        |
| extra T                                      | 4        | 289.1333 | 72.28333 | 0.117222 | 1:8      |          |      |        |
| extra AU                                     | 4        | 293.0667 | 73.26667 | 0.115556 | 1:10     |          |      |        |
| extra CU                                     | 4        | 298.6667 | 74.66667 | 0.142222 | 1:11     |          |      |        |
| ANOVA                                        |          |          |          |          |          |          |      |        |
| Source of Variation                          | SS       | df       | MS       | F        | P-value  | F crit   |      |        |
| Between Groups                               | 50.78093 | 5        | 10.15619 | 58.12761 | 1.78E-10 | 2.772853 |      |        |
| Within Groups                                | 3.145    | 18       | 0.174722 |          |          |          |      |        |
| Total                                        | 53.92593 | 23       |          |          |          |          |      |        |

Tables containing the values corresponding to  $T_m$  measurements carried out in triplicate. t1, t2, t3 stand for trials 1, 2, and 3; along with analysis of variance (ANOVA) for duplexes **1:5, 1:6, 1:7, 1:8, 1:10, 1:11.**

| 5'-CUC-CAC-ACA-UCC-ACC-ACI-ACC-UCA-ACU-CU-3' |          |          |          |          |          |          | Duplex |
|----------------------------------------------|----------|----------|----------|----------|----------|----------|--------|
|                                              | 1        | 2        | 3        | avg      | std dev  | RSD      |        |
| primer1                                      | 70.0     | 71.0     | 70.4     | 70.5     | 0.5      | 0.7%     | 2:5    |
| extra A                                      | 72.2     | 72.0     | 71.8     | 72.0     | 0.2      | 0.3%     | 2:6    |
| extra C                                      | 71.2     | 72.0     | 71.8     | 71.7     | 0.4      | 0.6%     | 2:7    |
| extra T                                      | 72.8     | 72.0     | 71.8     | 72.2     | 0.5      | 0.7%     | 2:8    |
| extra AU                                     | 71.6     | 72.0     | 72.3     | 72.0     | 0.4      | 0.5%     | 2:10   |
| extra CU                                     | 72.6     | 73.2     | 73.2     | 73.0     | 0.3      | 0.5%     | 2:11   |
| Anova: Single Factor                         |          |          |          |          |          |          |        |
| SUMMARY                                      |          |          |          |          | Duplex   |          |        |
| Groups                                       | Count    | Sum      | Average  | Variance |          |          |        |
| primer1                                      | 4        | 281.8667 | 70.46667 | 0.168889 | 2:5      |          |        |
| extra A                                      | 4        | 288      | 72       | 0.026667 | 2:6      |          |        |
| extra C                                      | 4        | 286.6667 | 71.66667 | 0.115556 | 2:7      |          |        |
| extra T                                      | 4        | 288.8    | 72.2     | 0.186667 | 2:8      |          |        |
| extra AU                                     | 4        | 287.8667 | 71.96667 | 0.082222 | 2:10     |          |        |
| extra CU                                     | 4        | 292      | 73       | 0.08     | 2:11     |          |        |
| ANOVA                                        |          |          |          |          |          |          |        |
| Source of Variation                          | SS       | df       | MS       | F        | P-value  | F crit   |        |
| Between Groups                               | 13.68667 | 5        | 2.737333 | 24.88485 | 1.69E-07 | 2.772853 |        |
| Within Groups                                | 1.98     | 18       | 0.11     |          |          |          |        |
| Total                                        | 15.66667 | 23       |          |          |          |          |        |

Tables containing the values corresponding to  $T_m$  measurements carried out in triplicate. t1, t2, t3 stand for trials 1, 2, and 3; along with analysis of variance (ANOVA) for duplexes **2:5, 2:6, 2:7, 2:8, 2:10, 2:11**.

| 5'-CUC-CAC-ACA-UCC-ACC-ACG <sup>oxo</sup> -ACC-UCA-ACU-CU-3' |          |          |          |          |          |          | Duplex |
|--------------------------------------------------------------|----------|----------|----------|----------|----------|----------|--------|
|                                                              | 1        | 2        | 3        | avg      | std dev  | RSD      |        |
| primer1                                                      | 70.6     | 70.6     | 70.0     | 70.4     | 0.3      | 0.5%     | 3:5    |
| extra A                                                      | 72.4     | 72.8     | 71.6     | 72.3     | 0.6      | 0.8%     | 3:6    |
| extra C                                                      | 71.1     | 70.0     | 70.6     | 70.6     | 0.6      | 0.8%     | 3:7    |
| extra T                                                      | 71.8     | 71.0     | 72.2     | 71.7     | 0.6      | 0.9%     | 3:8    |
| extra AU                                                     | 71.8     | 71.4     | 71.3     | 71.5     | 0.3      | 0.4%     | 3:10   |
| extra CU                                                     | 71.8     | 72.4     | 71.8     | 72.0     | 0.3      | 0.5%     | 3:11   |
| Anova: Single Factor                                         |          |          |          |          |          |          |        |
| SUMMARY                                                      |          |          |          |          | Duplex   |          |        |
| Groups                                                       | Count    | Sum      | Average  | Variance |          |          |        |
| primer1                                                      | 4        | 281.6    | 70.4     | 0.08     | 3:5      |          |        |
| extra A                                                      | 4        | 289.0667 | 72.26667 | 0.248889 | 3:6      |          |        |
| extra C                                                      | 4        | 282.2667 | 70.56667 | 0.202222 | 3:7      |          |        |
| extra T                                                      | 4        | 286.6667 | 71.66667 | 0.248889 | 3:8      |          |        |
| extra AU                                                     | 4        | 286      | 71.5     | 0.046667 | 3:10     |          |        |
| extra CU                                                     | 4        | 288      | 72       | 0.08     | 3:11     |          |        |
| ANOVA                                                        |          |          |          |          |          |          |        |
| Source of Variation                                          | SS       | df       | MS       | F        | P-value  | F crit   |        |
| Between Groups                                               | 11.54667 | 5        | 2.309333 | 15.28235 | 6.19E-06 | 2.772853 |        |
| Within Groups                                                | 2.72     | 18       | 0.151111 |          |          |          |        |
| Total                                                        | 14.26667 | 23       |          |          |          |          |        |

Tables containing the values corresponding to  $T_m$  measurements carried out in triplicate. t1, t2, t3 stand for trials 1, 2, and 3; along with analysis of variance (ANOVA) for duplexes **3:5, 3:6, 3:7, 3:8, 3:10, 3:11**.

| 5'-CUC-CAC-ACA-UCC-ACC-ACI <sup>OXO</sup> -ACC-UCA-ACU-CU-3' |              |            |                |                 |                |               | Duplex |
|--------------------------------------------------------------|--------------|------------|----------------|-----------------|----------------|---------------|--------|
|                                                              | 1            | 2          | 3              | avg             | std dev        | RSD           |        |
| primer1                                                      | 70.6         | 70.2       | 69.8           | 70.2            | 0.4            | 0.6%          | 4:5    |
| extra A                                                      | 71.0         | 70.8       | 71.6           | 71.1            | 0.4            | 0.6%          | 4:6    |
| extra C                                                      | 71.2         | 70.6       | 70.6           | 70.8            | 0.3            | 0.5%          | 4:7    |
| extra T                                                      | 70.8         | 71.8       | 72.0           | 71.5            | 0.6            | 0.9%          | 4:8    |
| extra AU                                                     | 71.8         | 72.8       | 71.7           | 72.1            | 0.6            | 0.8%          | 4:10   |
| extra CU                                                     | 71.8         | 71.0       | 72.4           | 71.7            | 0.7            | 1.0%          | 4:11   |
| Anova: Single Factor                                         |              |            |                |                 |                |               |        |
| SUMMARY                                                      |              |            |                |                 | Duplex         |               |        |
| <i>Groups</i>                                                | <i>Count</i> | <i>Sum</i> | <i>Average</i> | <i>Variance</i> |                |               |        |
| primer1                                                      | 4            | 280.8      | 70.2           | 0.1066667       | 4:5            |               |        |
| extra A                                                      | 4            | 284.5333   | 71.13333       | 0.1155556       | 4:6            |               |        |
| extra C                                                      | 4            | 283.2      | 70.8           | 0.08            | 4:7            |               |        |
| extra T                                                      | 4            | 286.1333   | 71.53333       | 0.2755556       | 4:8            |               |        |
| extra AU                                                     | 4            | 288.4      | 72.1           | 0.2466667       | 4:10           |               |        |
| extra CU                                                     | 4            | 286.9333   | 71.73333       | 0.3288889       | 4:11           |               |        |
| ANOVA                                                        |              |            |                |                 |                |               |        |
| <i>Source of Variation</i>                                   | <i>SS</i>    | <i>df</i>  | <i>MS</i>      | <i>F</i>        | <i>P-value</i> | <i>F crit</i> |        |
| Between Groups                                               | 9.42         | 5          | 1.884          | 9.8011561       | 0.000119       | 2.772853      |        |
| Within Groups                                                | 3.46         | 18         | 0.192222       |                 |                |               |        |
| Total                                                        | 12.88        | 23         |                |                 |                |               |        |

Tables containing the values corresponding to T<sub>m</sub> measurements carried out in triplicate. t1, t2, t3 stand for trials 1, 2, and 3; along with analysis of variance (ANOVA) for duplexes **4:5, 4:6, 4:7, 4:8, 4:10, 4:11**.



| 5'-CUC-CAC-ACA-UCC-ACC-ACI <sup>Br</sup> -ACC-UCA-ACU-CU-3' |              |            |                |                 |                |               | Duplex |
|-------------------------------------------------------------|--------------|------------|----------------|-----------------|----------------|---------------|--------|
|                                                             | 1            | 2          | 3              | avg             | std dev        | RSD           |        |
| primer1                                                     | 67.8         | 68.8       | 67.8           | 68.1            | 0.6            | 0.8%          | 9:5    |
| extra A                                                     | 71.6         | 71.2       | 70.4           | 71.1            | 0.6            | 0.9%          | 9:6    |
| extra C                                                     | 70.8         | 70.4       | 70.4           | 70.5            | 0.2            | 0.3%          | 9:7    |
| extra T                                                     | 72.0         | 72.2       | 72.2           | 72.1            | 0.1            | 0.2%          | 9:8    |
| extra AU                                                    | 71.2         | 71.8       | 72.2           | 71.7            | 0.5            | 0.7%          | 9:10   |
| extra CU                                                    | 70.4         | 70.6       | 70.2           | 70.4            | 0.2            | 0.3%          | 9:11   |
|                                                             |              |            |                |                 |                |               |        |
|                                                             |              |            |                |                 |                |               |        |
|                                                             |              |            |                |                 |                |               |        |
|                                                             |              |            |                |                 |                |               |        |
| Anova: Single Factor                                        |              |            |                |                 |                |               |        |
| SUMMARY                                                     |              |            |                |                 | Duplex         |               |        |
| <i>Groups</i>                                               | <i>Count</i> | <i>Sum</i> | <i>Average</i> | <i>Variance</i> |                |               |        |
| primer1                                                     | 4            | 272.5333   | 68.13333       | 0.222222        | 9:5            |               |        |
| extra A                                                     | 4            | 284.2667   | 71.06667       | 0.248889        | 9:6            |               |        |
| extra C                                                     | 4            | 282.1333   | 70.53333       | 0.035556        | 9:7            |               |        |
| extra T                                                     | 4            | 288.5333   | 72.13333       | 0.008889        | 9:8            |               |        |
| extra AU                                                    | 4            | 286.9333   | 71.73333       | 0.168889        | 9:10           |               |        |
| extra CU                                                    | 4            | 281.6      | 70.4           | 0.026667        | 9:11           |               |        |
|                                                             |              |            |                |                 |                |               |        |
|                                                             |              |            |                |                 |                |               |        |
| ANOVA                                                       |              |            |                |                 |                |               |        |
| <i>Source of Variation</i>                                  | <i>SS</i>    | <i>df</i>  | <i>MS</i>      | <i>F</i>        | <i>P-value</i> | <i>F crit</i> |        |
| Between Groups                                              | 39.82222     | 5          | 7.964444       | 67.2            | 5.224E-11      | 2.772853      |        |
| Within Groups                                               | 2.133333     | 18         | 0.118519       |                 |                |               |        |
| Total                                                       | 41.95556     | 23         |                |                 |                |               |        |
|                                                             |              |            |                |                 |                |               |        |

Tables containing the values corresponding to  $T_m$  measurements carried out in triplicate. t1, t2, t3 stand for trials 1, 2, and 3; along with analysis of variance (ANOVA) for duplexes **9:5, 9:6, 9:7, 9:8, 9:10, 9:11**.
