# Supplementary material for: Translesion synthesis by AMV, HIV, and MMLVreverse transcriptases using RNA templates containing inosine, guanosine, and their 8-oxo-7,8-dihydropurine derivatives
Source: PubMed Central journal article supplement (PMC7455023; doi:10.1371/journal.pone.0235102), 2020-08-28
Supplement: pone.0235102.s006.pdf [file pone.0235102.s006.pdf]

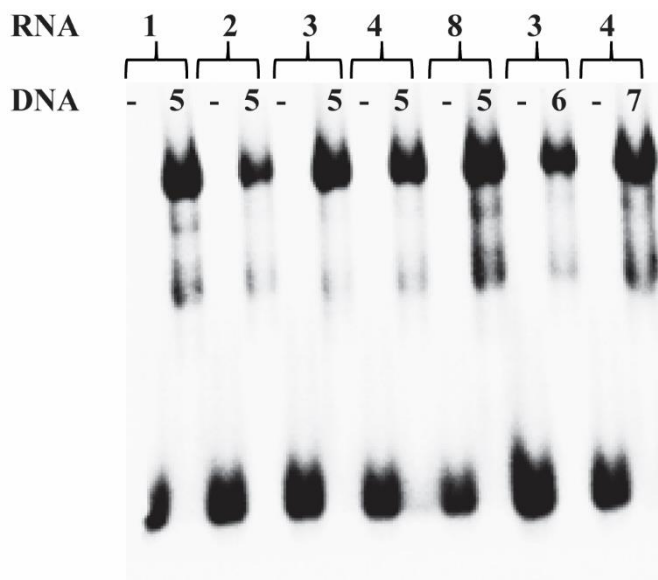

**S6 File:** Native PAGE (20 %) of RNA w/wo DNA, showing duplex formation in the MMLV buffer (as described in the experimental section).
