# Supplementary material for: Translesion synthesis by AMV, HIV, and MMLVreverse transcriptases using RNA templates containing inosine, guanosine, and their 8-oxo-7,8-dihydropurine derivatives
Source: PubMed Central journal article supplement (PMC7455023; doi:10.1371/journal.pone.0235102), 2020-08-28
Supplement: pone.0235102.s007.pdf [file pone.0235102.s007.pdf]

1 - 4 3'- CUC CAC ACA UCC ACC ACX ACC UCA ACU GU  
 5 5' - HOP<sup>+</sup>(O)<sub>3</sub> - GAG GTG TGT AGG TGG TG

X = 1 - G; 2 - I; 3 - 8-oxoG; 4 - 8-oxoI

(A)

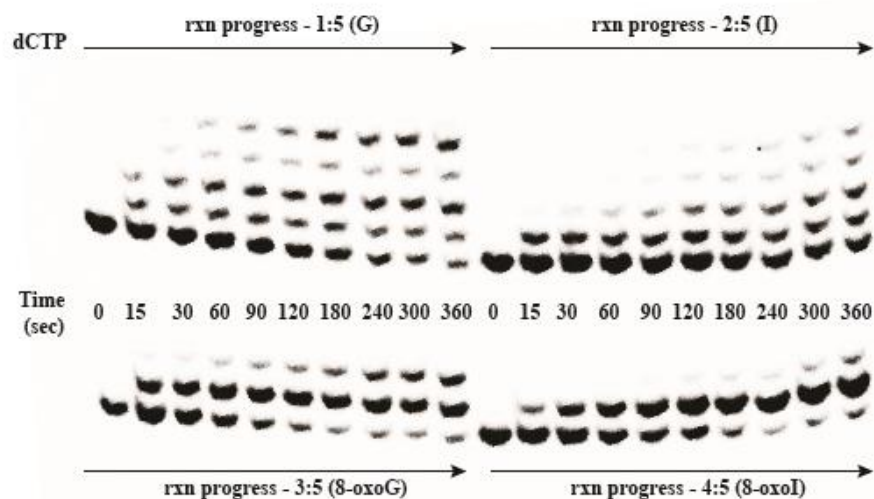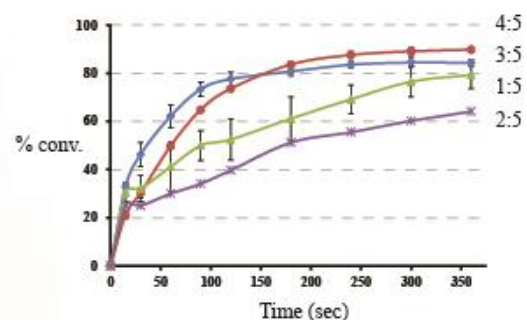

(B)

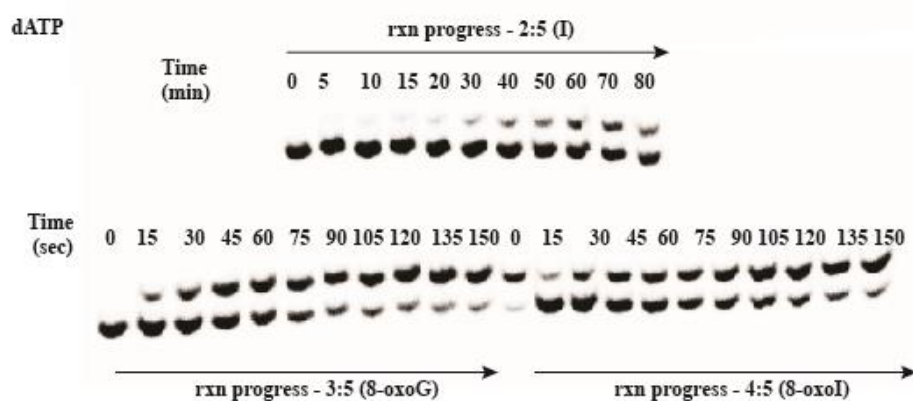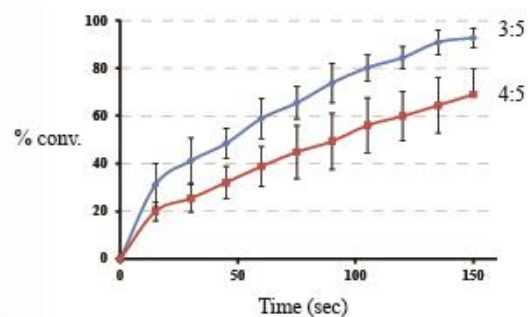

**S7 File:** Relative rates for 1:5 – 4:5 with dCTP and 2:5 – 4:5 with dATP at constant [dNTP] and [AMV-RT] as a function of time. Reactions carried out at rt.
