# Supplementary material for: Translesion synthesis by AMV, HIV, and MMLVreverse transcriptases using RNA templates containing inosine, guanosine, and their 8-oxo-7,8-dihydropurine derivatives
Source: PubMed Central journal article supplement (PMC7455023; doi:10.1371/journal.pone.0235102), 2020-08-28
Supplement: pone.0235102.s008.pdf [file pone.0235102.s008.pdf]

1 - 4    3'- CUC CAC ACA UCC ACC ACX ACC UCA ACU GU  
 5' - HOP\*(O)<sub>3</sub> - GAG GTG TGT AGG TGG TGY U

X = 8-BrI

Y = 6 - A; 7 - C

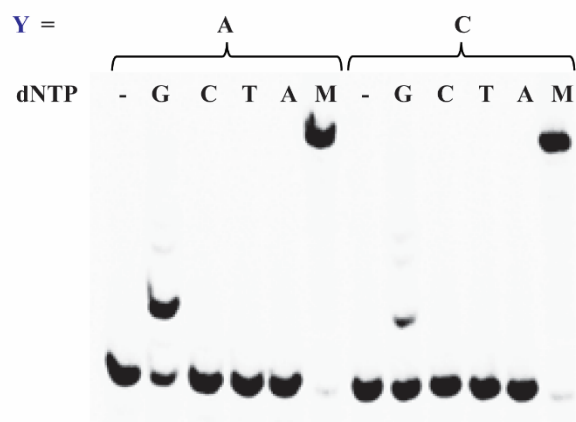

**S8 File.** Duplexes 9:6 and 9:7 in the presence of AMV-RT.
