# Supplementary material for: Translesion synthesis by AMV, HIV, and MMLVreverse transcriptases using RNA templates containing inosine, guanosine, and their 8-oxo-7,8-dihydropurine derivatives
Source: PubMed Central journal article supplement (PMC7455023; doi:10.1371/journal.pone.0235102), 2020-08-28
Supplement: pone.0235102.s009.pdf [file pone.0235102.s009.pdf]

8 3'-CUC CAC ACA UCC ACC ACX ACC UCA ACU GU  
 5'-HOP\*(O)<sub>3</sub>-GAG GTG TGT AGG TGG TGY U

X = 1 - G; 2 - I; 3 - 8-oxoG; 4 - 8-oxoI; 9 - 8-BrI  
 Y = 10 - A; 11 - C

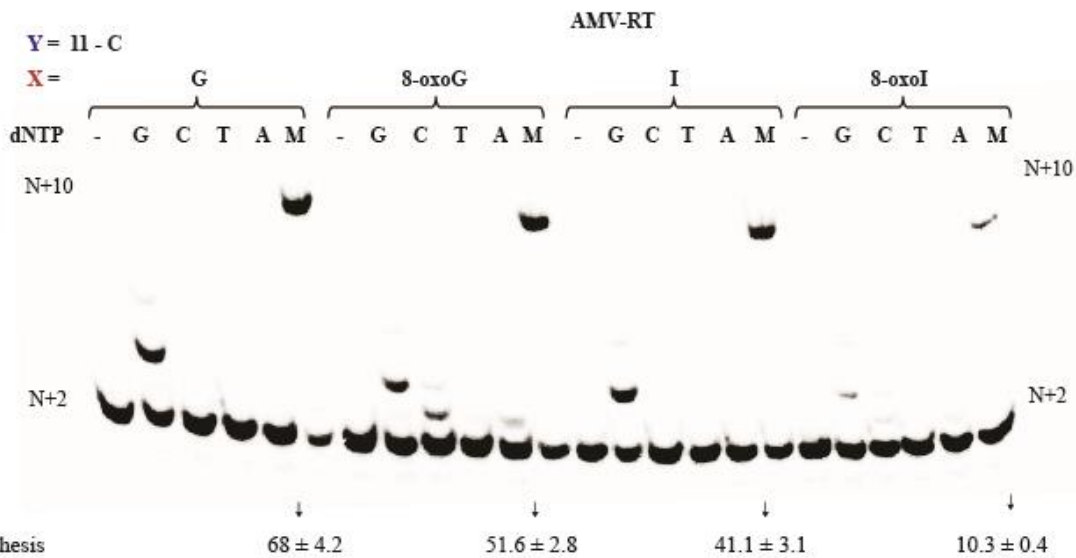

Y = 11 - C

% cDNA synthesis

**S9 File.** Duplexes 1:11 - 4:11 in the presence of AMV-RT.
