# Supplementary material for: Translesion synthesis by AMV, HIV, and MMLVreverse transcriptases using RNA templates containing inosine, guanosine, and their 8-oxo-7,8-dihydropurine derivatives
Source: PubMed Central journal article supplement (PMC7455023; doi:10.1371/journal.pone.0235102), 2020-08-28
Supplement: pone.0235102.s010.pdf [file pone.0235102.s010.pdf]

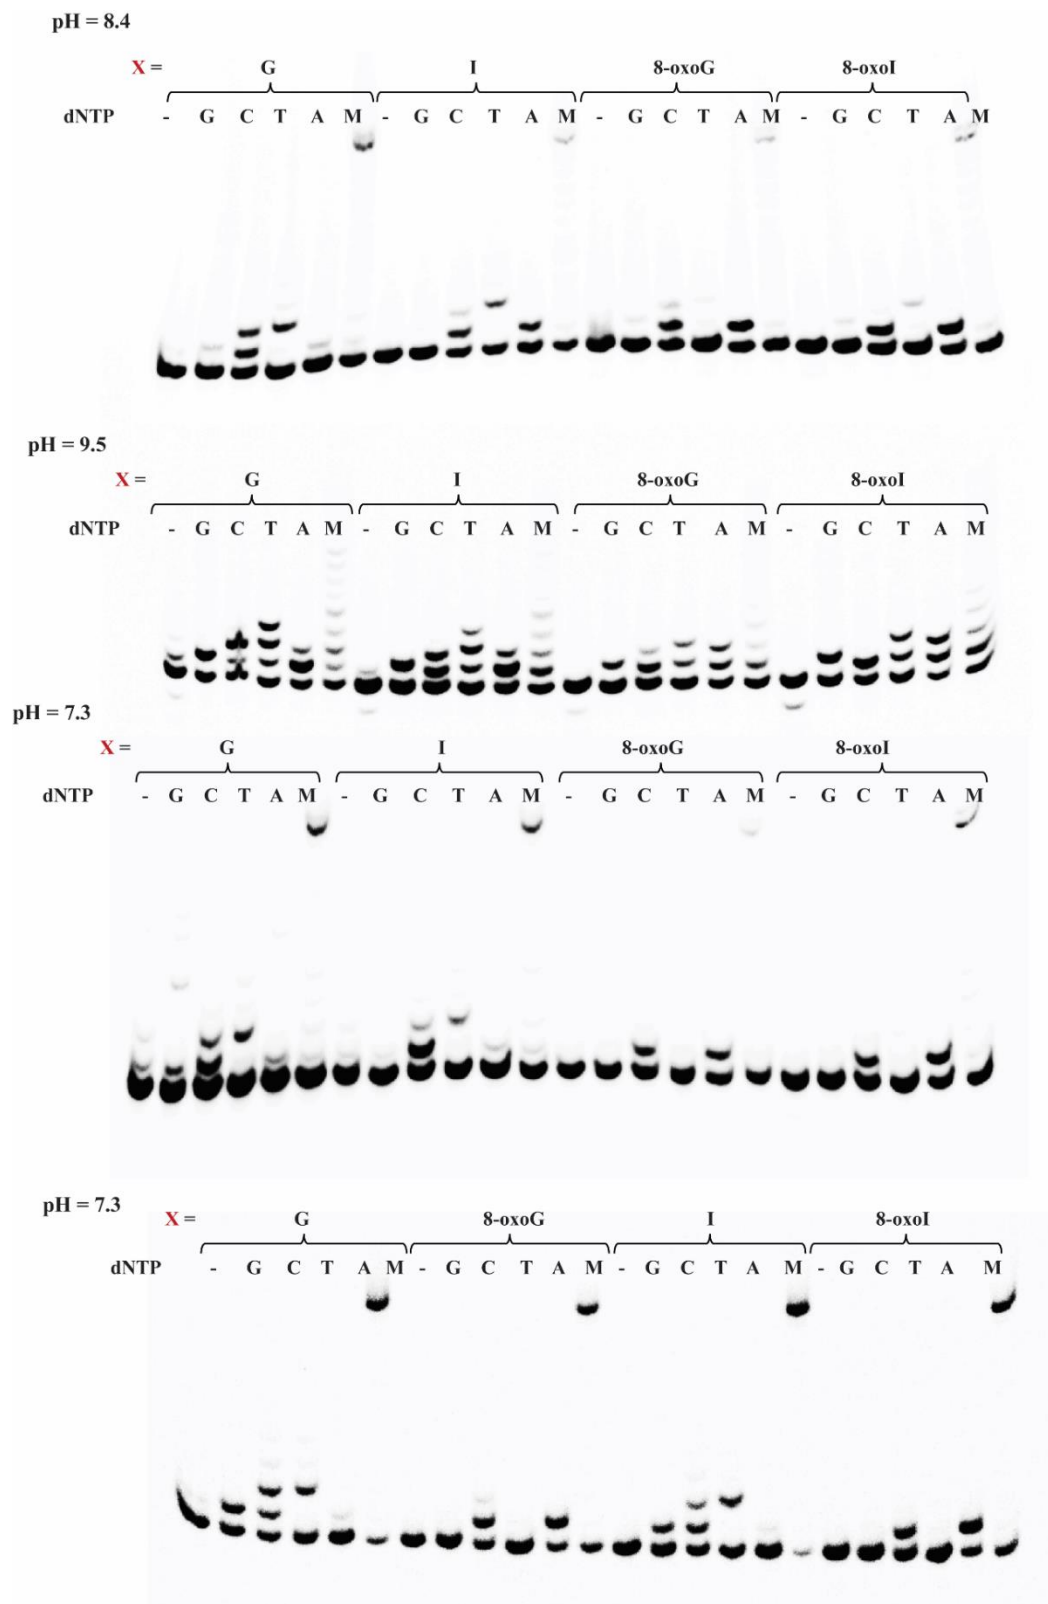

**S10 File.** Duplexes 1:5 - 4:5 in the presence of AMV-RT at various pH values. Top three experiments represent incubation times of 5 min and the bottom experiment represents incubation time of 40 min
