# Supplementary material for: Translesion synthesis by AMV, HIV, and MMLVreverse transcriptases using RNA templates containing inosine, guanosine, and their 8-oxo-7,8-dihydropurine derivatives
Source: PubMed Central journal article supplement (PMC7455023; doi:10.1371/journal.pone.0235102), 2020-08-28
Supplement: pone.0235102.s011.pdf [file pone.0235102.s011.pdf]

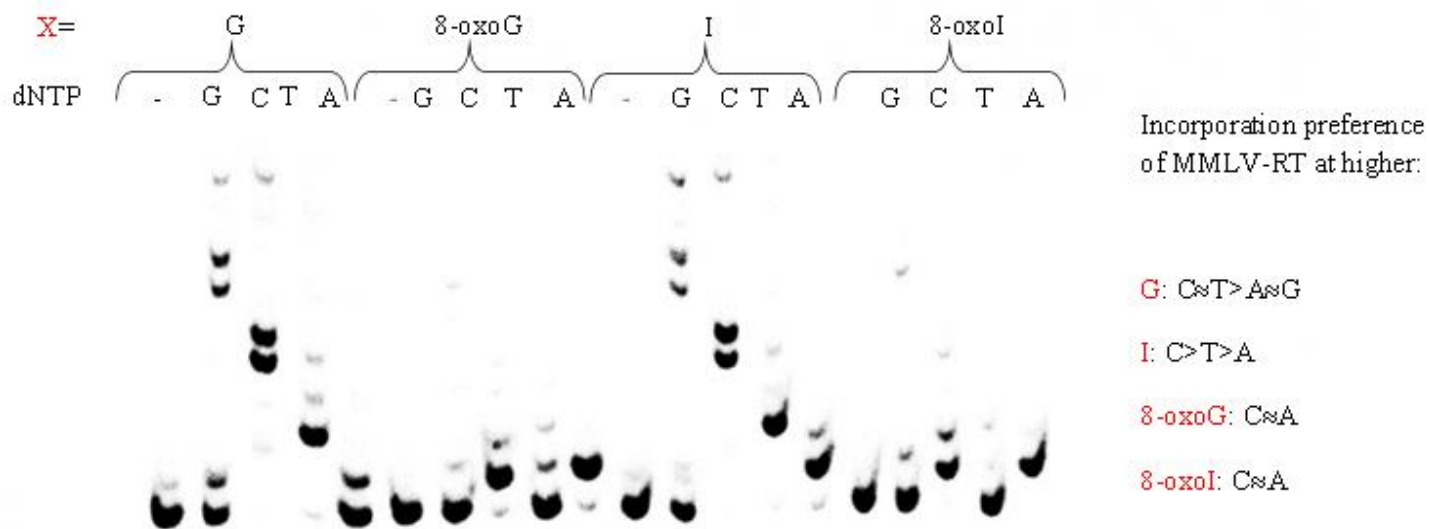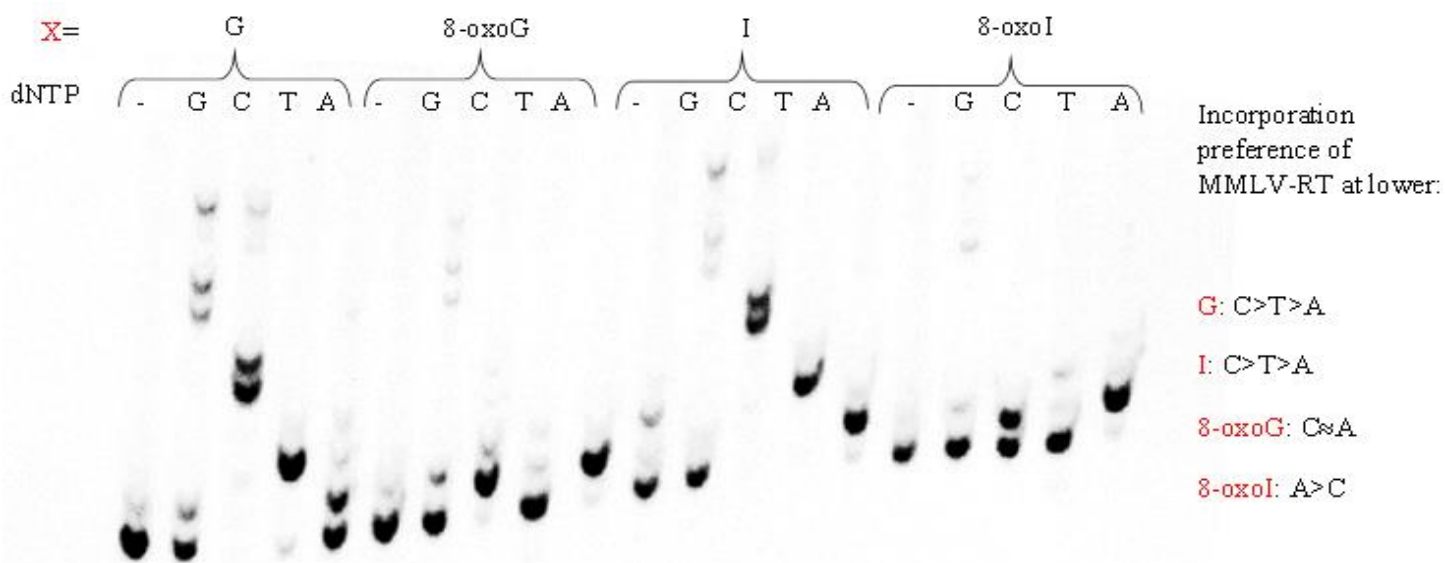

**S11 File.** RNA:DNA 1:5-4:5 at higher (top) and lower (bottom) [MMLV-RT], see table in experimental section for description.

1-4 3'-CUC CAC ACA UCC ACC ACX ACC UCA ACU GU

5'-HOP\*(O)<sub>3</sub>- GAG GTG TGT AGG TGG TGY

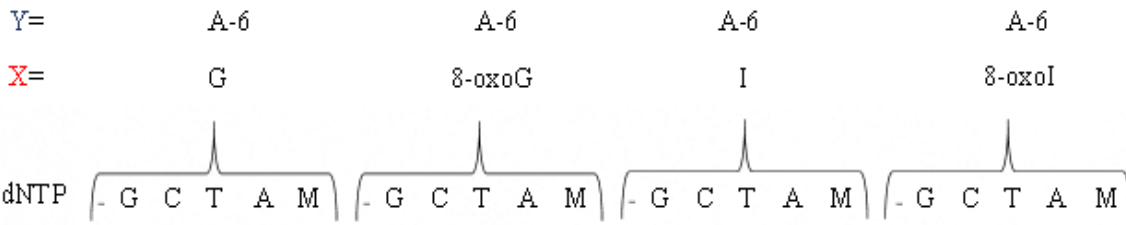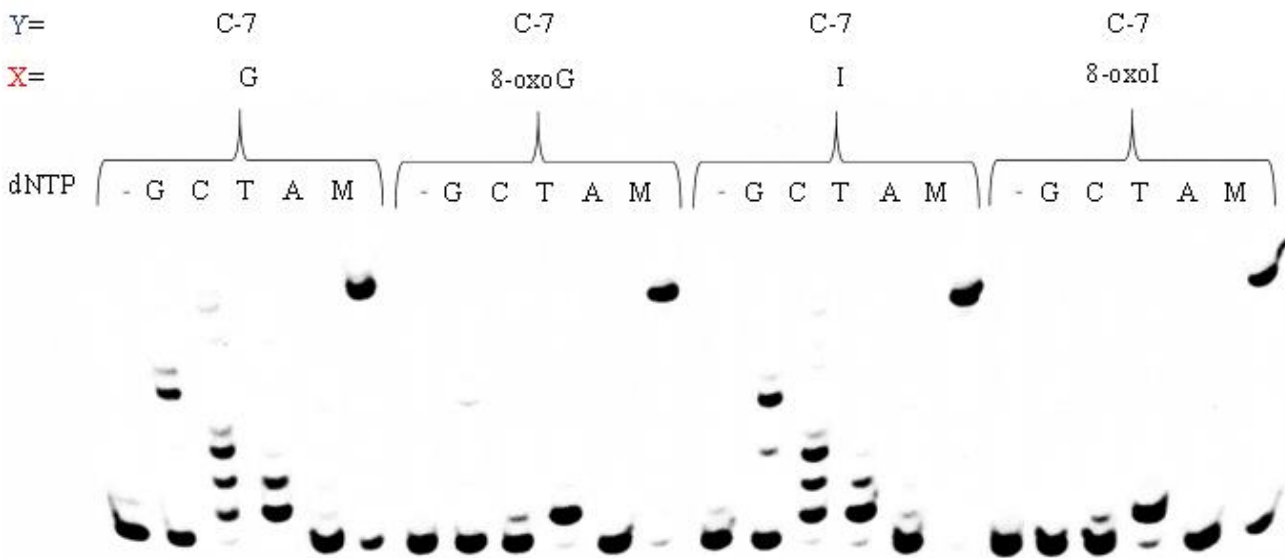

S11 File. RNA:DNA 1:6-4:6 & 1:7-4:7 at lower [MMLV].
