# Supplementary material for: Translesion synthesis by AMV, HIV, and MMLVreverse transcriptases using RNA templates containing inosine, guanosine, and their 8-oxo-7,8-dihydropurine derivatives
Source: PubMed Central journal article supplement (PMC7455023; doi:10.1371/journal.pone.0235102), 2020-08-28
Supplement: pone.0235102.s013.pdf [file pone.0235102.s013.pdf]

3'- CUC CAC ACA UCC ACC ACX ACC UCA ACU GU  
 (5) 5' - HOP\*(O)<sub>3</sub> - GAG GTG TGT AGG TGG TG

X = (1) - G; (2) - I; (3) - 8-oxoG; (4) - 8-oxoI

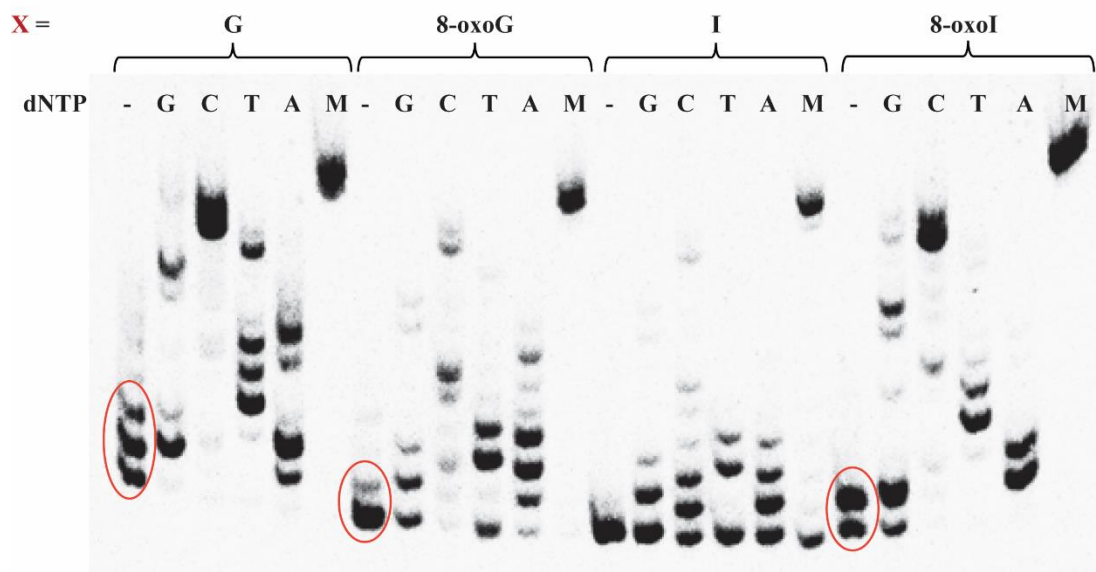

Additional bands were observed on the controls upon increasing the concentration of the RT.  
 This observation is general of all RTs.

**S13 File.** Duplexes 1:5 – 4:5 in the presence of higher [HIV-RT]. HIV units used were ca. 0.187 per well, 30 times more than the experiments described on the manuscript.
