# Supplementary material for: Translesion synthesis by AMV, HIV, and MMLVreverse transcriptases using RNA templates containing inosine, guanosine, and their 8-oxo-7,8-dihydropurine derivatives
Source: PubMed Central journal article supplement (PMC7455023; doi:10.1371/journal.pone.0235102), 2020-08-28
Supplement: pone.0235102.s014.pdf [file pone.0235102.s014.pdf]

3' - CUC CAC ACA UCC ACC ACX ACC UCA ACU GU  
 5' - HOP<sup>+</sup>(O)<sub>3</sub> - GAG GTG TGT AGG TGG TGY U

X = 1 - G; 2 - I; 3 - 8-oxoG; 4 - 8-oxoI; 9 - 8-BrI  
 Y = 10 - A; 11 - C

HIV-RT

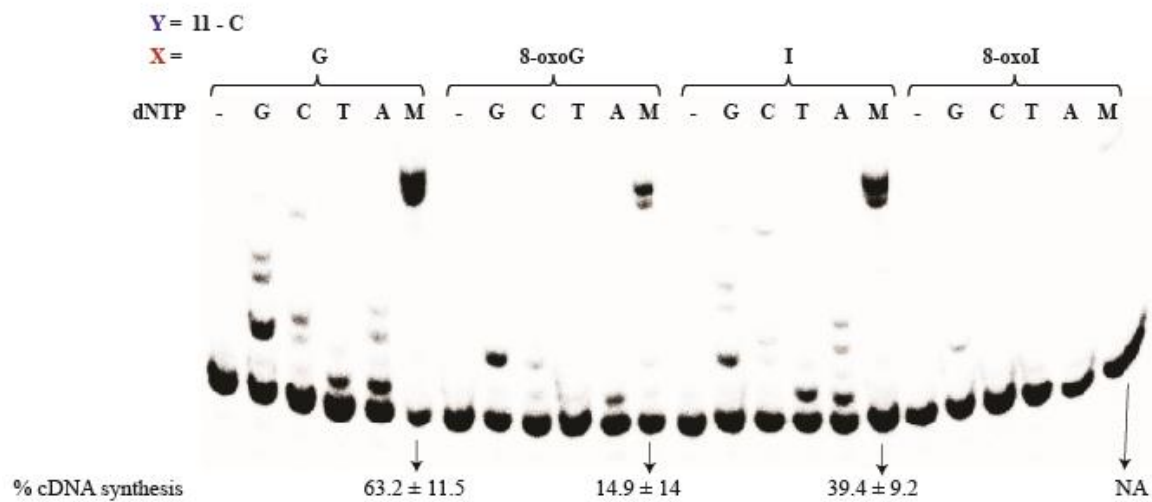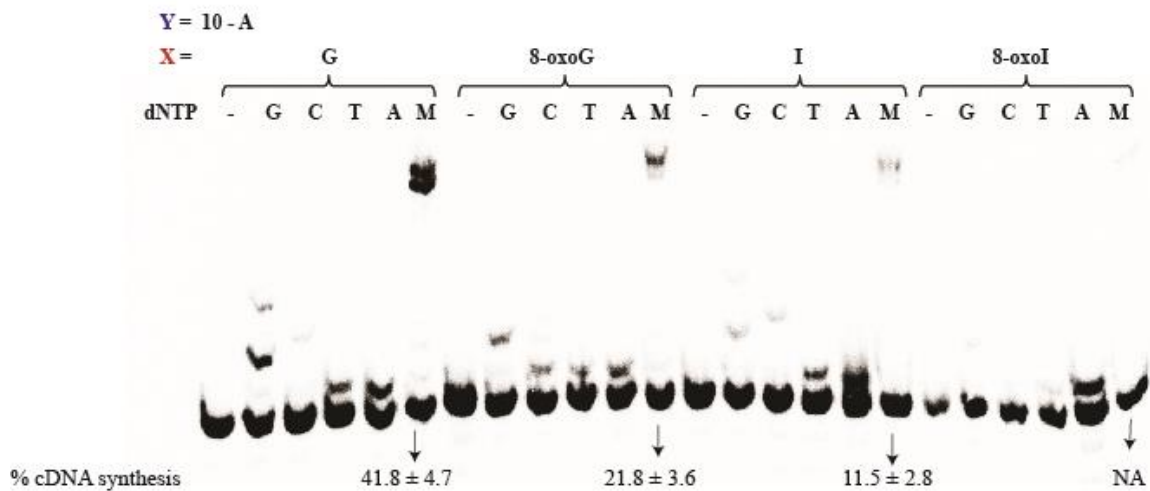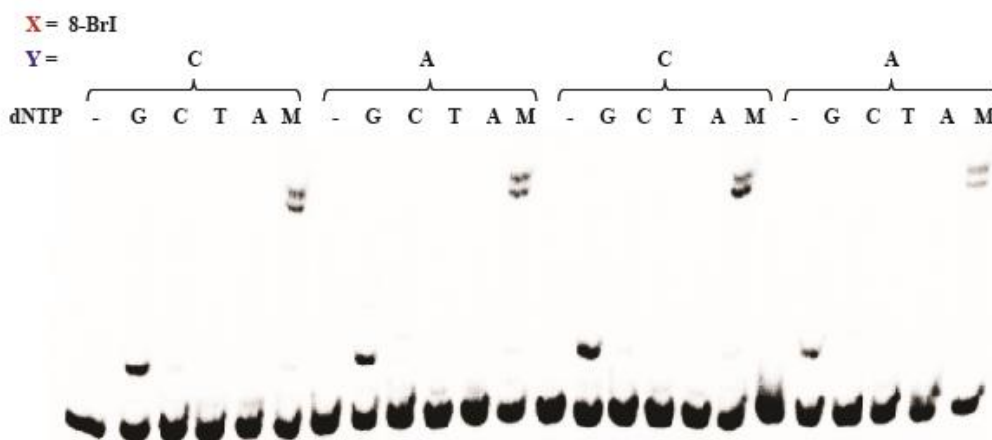

dG added in app. 18%  
 in all cases

Full cDNA elongation  
 occurred in app. 21%  
 in all cases

S14 File. Duplexes 1:10 – 4:10, 1:11 – 4:11 and 9:10 / 9:11 in the presence of HIV-RT
