# Supplementary material for: Translesion synthesis by AMV, HIV, and MMLVreverse transcriptases using RNA templates containing inosine, guanosine, and their 8-oxo-7,8-dihydropurine derivatives
Source: PubMed Central journal article supplement (PMC7455023; doi:10.1371/journal.pone.0235102), 2020-08-28
Supplement: pone.0235102.s015.pdf [file pone.0235102.s015.pdf]

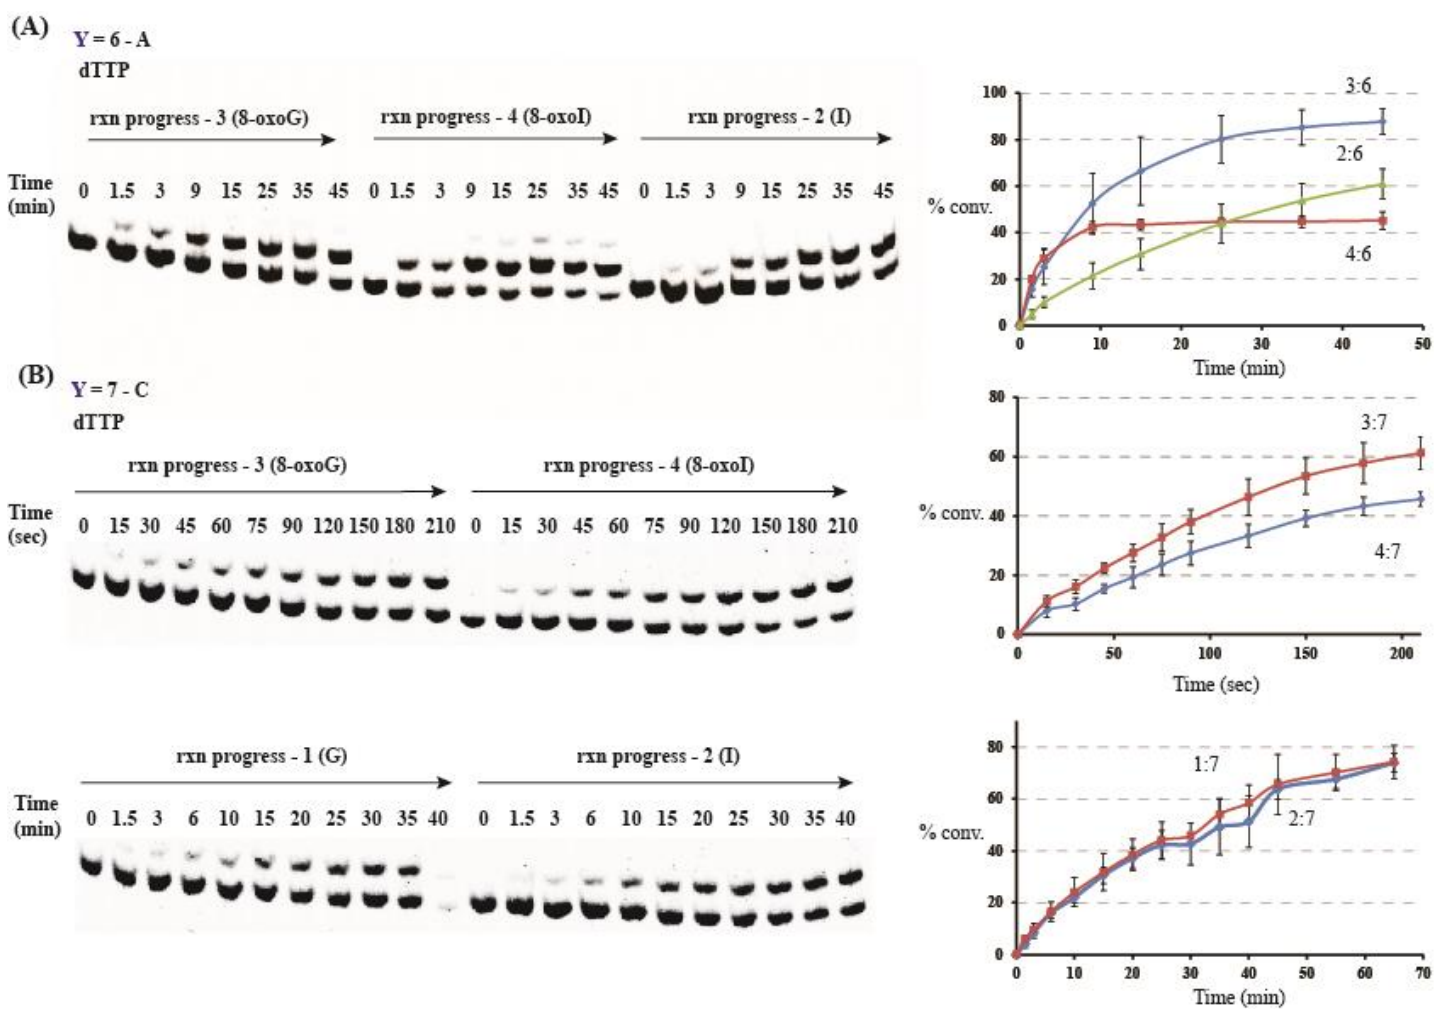

**S 15 File.** Relative rates for 2:6 – 4:6 with dTTP and 1:7 – 4:7 with dTTP at constant [dNTP] and [AMV-RT] as a function of time. Reactions carried out at rt.
